# Supplementary material
Source: publisher figshare collection journal article supplement (https://acs.figshare.com/ndownloader/files/5905401)

## Supporting Information

### Regioselective Intermolecular [2+2]-Cycloaddition of $\alpha$ -Iodo Unsaturated Ketones Promoted by Diisobutylaluminum Hydride

Hai-Tao Zhu,\* Sen Ke, Ni-Ni Zhou, and De-Suo Yang

Shannxi Key Laboratory of Phytochemistry, College of Chemistry and Chemical Engineering, Baoji University of Arts and Sciences, Baoji 721013, China.

E-mail: zhuht@bjwlxy.edu.cn

### Table of Contents

|   |                                                                             |          |
|---|-----------------------------------------------------------------------------|----------|
| 1 | General Remarks                                                             | S2       |
| 2 | General Procedure for the Synthesis of Compounds and Inhibition Experiments | S2-S3    |
| 3 | Reference                                                                   | S3       |
| 4 | Characterization Data of 2a, 2e-t                                           | S4-S10   |
| 5 | Crystallographic data of 2a                                                 | S10- S11 |
| 6 | $^1\text{H}$ NMR and $^{13}\text{C}$ NMR Spectra for Products               | S12-S45  |

## General Remarks

Column chromatography was carried out on silica gel (200-300 meshes). Conversion was monitored by thin layer chromatography (TLC).  $^1\text{H}$  NMR spectra were recorded on 400 MHz in chloroform- $d$  solution and  $^{13}\text{C}$  NMR spectra were recorded on 100 MHz in chloroform- $d$  solution. IR spectra were recorded on a FT-IR spectrometer and only major peaks are reported in  $\text{cm}^{-1}$ . All products were further characterized by high resolution mass spectra (HRMS); copies of their  $^1\text{H}$  NMR and  $^{13}\text{C}$  NMR spectra are provided in the Supporting Information. The commercial solvents were distilled over  $\text{CaH}_2$ .

## Synthetic Procedures and Spectral Data

All starting materials were prepared according to previously reported procedures.<sup>1</sup>

### Synthesis of substituted cyclobutane derivatives:

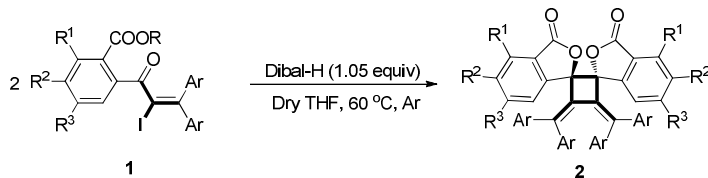

To a solution of 2-(2-iodo-3,3-diarylacryloyl)-benzoates (**1**) (0.20 mmol) in anhydrous THF (2.0 mL) was added 1.05 equiv diisobutylaluminum hydride (Dibal-H) under argon atmosphere. Subsequently, the reaction mixture was stirred for 2 h at 60  $^\circ\text{C}$ . When the reaction was completed, the reaction mixture was quenched by addition of saturated ammonium chloride solution and extracted with ethyl acetate (3 x 15 mL), washed with water, saturated brine, dried over  $\text{Na}_2\text{SO}_4$  and evaporated under reduced pressure. The residue was purified by chromatography on silica gel to afford corresponding cyclobutane products **2**.

### General procedure for inhibition experiments:

To a solution of methyl-2-(2-iodo-3,3-diphenylacryloyl)benzoate (**1a**) (0.20 mmol) and 2.0 equiv 2,2,6,6-tetramethylpiperidinoxy (TEMPO) or 2.0 equiv 2,6-di-tert-butyl-4-methylphenol (BHT) in anhydrous THF (2.0 mL) was added 1.05 equiv diisobutylaluminum hydride (Dibal-H) under argon atmosphere. Subsequently, the reaction mixture was stirred for 2 h at 60  $^\circ\text{C}$ . When the reaction was completed, the

reaction mixture was quenched by addition of saturated ammonium chloride solution and extracted with ethyl acetate (3 x 15 mL), washed with water, saturated brine, dried over Na<sub>2</sub>SO<sub>4</sub> and evaporated under reduced pressure. The residue was purified by chromatography on silica gel to afford the corresponding cyclobutane product **2a** in 70% and 68% yield, respectively.

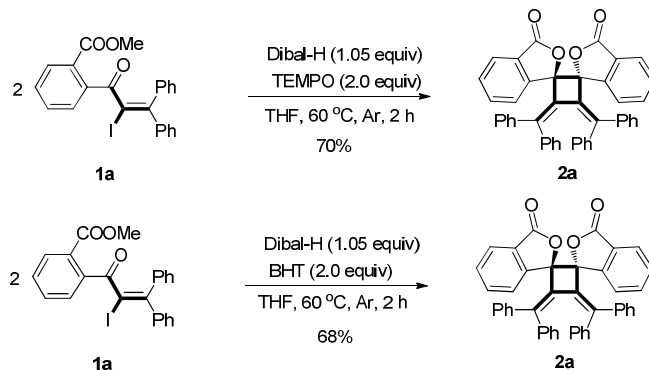

#### General procedure for mechanism investigation:<sup>2</sup>

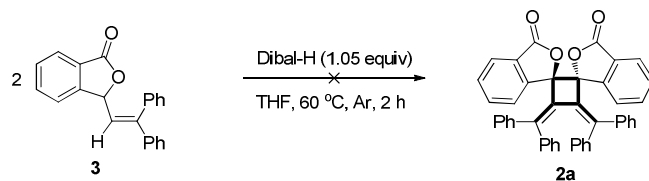

To a solution of 3-(2,2-diphenylvinyl)isobenzofuran-1(3H)-one (**3**) (0.20 mmol) in anhydrous THF (2.0 mL) was added 1.05 equiv diisobutylaluminum hydride (Dibal-H) under argon atmosphere. Subsequently, the reaction mixture was stirred for 2 h at 60 °C. When the reaction was determined by TLC analysis, the desired product **2a** was not obtained.

#### Reference:

- (1) H.-T. Zhu, X. Dong, L.-J. Wang, M.-J. Zhong, X.-Y. Liu and Y.-M. Liang, *Chem. Commun.*, 2012, **48**, 10748;
- (2) H.-T. Zhu, M.-J. Fan, D.-S. Yang, X.-L. Wang, S. Ke, C.-Y. Zhang and Z.-H. Guan, *Org. Chem. Front.*, 2015, **2**, 506.

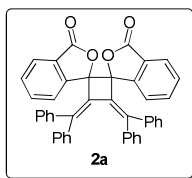

**3,4-bis(diphenylmethylene)-3',3''H-dispiro[cyclobutane-1,1':2,1''-diisobenzofunan]-3',3''-dione (2a)** The crude product was purified by flash chromatography (Hexanes:EtOAc = 4:1) to provide (90.5 mg, 73%) as a yellow solid.  $^1\text{H}$  NMR (400 MHz,  $\text{CDCl}_3$ )  $\delta$  ppm 7.87 (d,  $J$  = 8.0 Hz, 2H), 7.62 (t,  $J$  = 7.2 Hz, 2H), 7.55 (d,  $J$  = 7.6 Hz, 2H), 7.40 (t,  $J$  = 7.6 Hz, 2H), 7.11-7.08 (m, 2H), 7.01-6.96 (m, 10H), 6.84-6.79 (m, 8H).  $^{13}\text{C}$  NMR (100 MHz,  $\text{CDCl}_3$ )  $\delta$  ppm 168.4, 146.9, 141.6, 139.9, 138.7, 134.1, 132.6, 129.5, 129.4, 128.9, 128.3, 128.2, 127.8, 127.4, 126.2, 124.9, 124.3, 92.3. IR (neat,  $\text{cm}^{-1}$ ): 3061, 1775, 1597, 1466, 1287, 1062, 972, 726. HRMS (ESI) Calcd for  $\text{C}_{44}\text{H}_{28}\text{NaO}_4$ :  $\text{M}+\text{Na}$  = 643.1880. Found: 643.1853.

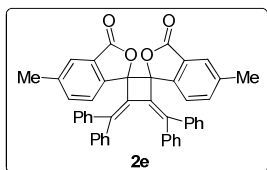

**3,4-bis(diphenylmethylene)-5',5''-dimethyl-3',3''H-dispiro[cyclobutane-1,1':2,1''-diisobenzofunan]-3',3''-dione (2e)** The crude product was purified by flash chromatography (Hexanes:EtOAc = 4:1) to provide (92.1 mg, 71%) as a yellow solid.  $^1\text{H}$  NMR (400 MHz,  $\text{CDCl}_3$ )  $\delta$  ppm 7.71 (d,  $J$  = 8.0 Hz, 2H), 7.41 (dd,  $J$  = 7.6, 0.8 Hz, 2H), 7.33 (d,  $J$  = 0.8 Hz, 2H), 7.12-7.08 (m, 2H), 7.01-6.95 (m, 10H), 6.84-6.79 (m, 8H), 2.38 (s, 6H).  $^{13}\text{C}$  NMR (100 MHz,  $\text{CDCl}_3$ )  $\delta$  ppm 168.6, 144.4, 141.3, 140.0, 139.8, 138.8, 135.2, 132.8, 129.5, 129.0, 128.2, 128.1, 127.7, 127.4, 126.4, 124.8, 123.9, 92.3, 21.2. IR (neat,  $\text{cm}^{-1}$ ): 3058, 1762, 1592, 1442, 1282, 1159, 984, 745. HRMS (ESI) Calcd for  $\text{C}_{46}\text{H}_{32}\text{NaO}_4$ :  $\text{M}+\text{Na}$  = 671.2193. Found: 671.2173.

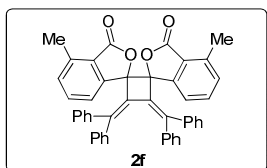

**3,4-bis(diphenylmethylene)-4',4''-dimethyl-3',3''H-dispiro[cyclobutane-1,1':2,1''-diisobenzofunan]-3',3''-dione (2f)** The crude product was purified by flash chromatography (Hexanes:EtOAc = 4:1) to provide (68.7 mg, 53%) as a yellow solid.  $^1\text{H}$  NMR (400 MHz,  $\text{CDCl}_3$ )  $\delta$  ppm 7.72 (d,  $J$  = 7.6 Hz, 2H), 7.52 (t,  $J$  = 7.6 Hz, 2H), 7.18-7.12 (m, 4H), 7.03-6.98 (m, 5H), 6.95-6.81 (m, 5H), 6.79-6.76 (m, 8H), 2.44 (s, 6H).  $^{13}\text{C}$  NMR (100 MHz,  $\text{CDCl}_3$ )  $\delta$  ppm 168.5, 148.2, 140.9, 139.9, 138.9, 138.7, 133.8, 133.0, 130.8, 129.6, 128.9, 128.1, 128.0, 127.5, 127.3, 123.6, 121.6,

91.1, 17.2. IR (neat,  $\text{cm}^{-1}$ ): 3037, 1759, 1590, 1432, 1292, 1133, 964, 765. HRMS (ESI) Calcd for  $\text{C}_{46}\text{H}_{32}\text{NaO}_4$ :  $M+\text{Na} = 671.2193$ . Found: 671.2198.

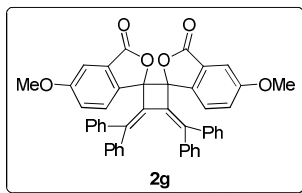

**3,4-bis(diphenylmethylene)-5',5''-dimethoxy-3',3''H-dispiro[cyclobutane-1,1':2,1''-diisobenzofuran]-3',3''-dione (2g)** The crude product was purified by flash chromatography (Hexanes:EtOAc = 2:1) to provide (87.1 mg, 64%) as a yellow solid.  $^1\text{H}$  NMR (400 MHz,  $\text{CDCl}_3$ )  $\delta$  ppm 7.66 (d,  $J = 8.4$  Hz, 2H), 7.14-7.11 (m, 4H), 7.09-6.95 (m, 12H), 6.84-6.80 (m, 8H), 3.78 (s, 6H).  $^{13}\text{C}$  NMR (100 MHz,  $\text{CDCl}_3$ )  $\delta$  ppm 168.5, 160.9, 141.6, 139.9, 138.9, 138.8, 133.0, 129.5, 129.0, 128.2, 128.1, 127.8, 127.7, 127.4, 125.3, 122.6, 107.0, 92.6, 55.7. IR (neat,  $\text{cm}^{-1}$ ): 3056, 1773, 1619, 1491, 1280, 1022, 981, 734. HRMS (ESI) Calcd for  $\text{C}_{46}\text{H}_{32}\text{NaO}_6$ :  $M+\text{Na} = 703.2091$ . Found: 703.2100.

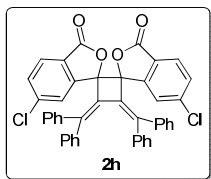

**3,4-bis(diphenylmethylene)-6',6''-dichloro-3',3''H-dispiro[cyclobutane-1,1':2,1''-diisobenzofuran]-3',3''-dione (2h)** The crude product was purified by flash chromatography (Hexanes:EtOAc = 4:1) to provide (100.5 mg, 73%) as a yellow solid.  $^1\text{H}$  NMR (400 MHz,  $\text{CDCl}_3$ )  $\delta$  ppm 7.76-7.74 (m, 2 H), 7.43 (dd,  $J = 8.4$ , 3.6 Hz, 2H), 7.34 (d,  $J = 8.0$  Hz, 2H), 7.12-7.09 (m, 2H), 7.05-6.94 (m, 10H), 6.88-6.80 (m, 8H).  $^{13}\text{C}$  NMR (100 MHz,  $\text{CDCl}_3$ )  $\delta$  ppm 167.1, 147.6, 142.6, 140.7, 139.5, 138.4, 132.0, 130.4, 129.6, 129.0, 128.6, 128.5, 127.9, 127.4, 126.1, 124.9, 124.8, 92.0. IR (neat,  $\text{cm}^{-1}$ ): 3057, 1775, 1591, 1443, 1236, 1071, 986, 741. HRMS (ESI) Calcd for  $\text{C}_{44}\text{H}_{26}\text{Cl}_2\text{NaO}_4$ :  $M+\text{Na} = 711.1100$ . Found: 711.1109.

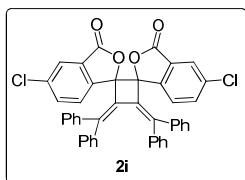

**3,4-bis(diphenylmethylene)-5',5''-dichloro-3',3''H-dispiro[cyclobutane-1,1':2,1''-diisobenzofuran]-3',3''-dione (2i)** The crude product was purified by flash chromatography (Hexanes:EtOAc = 4:1) to provide (77.1 mg, 56%) as a yellow

**solid.**  $^1\text{H}$  NMR (400 MHz,  $\text{CDCl}_3$ )  $\delta$  ppm 7.72 (d,  $J = 8.4$  Hz, 2H), 7.52 (dd,  $J = 8.0$  Hz, 2.0 Hz, 2H), 7.47 (d,  $J = 1.6$  Hz, 2H), 7.12 (t,  $J = 7.6$  Hz, 2H), 7.04-6.94 (m, 10H), 6.84-6.80 (m, 8H).  $^{13}\text{C}$  NMR (100 MHz,  $\text{CDCl}_3$ )  $\delta$  ppm 166.8, 144.0, 142.5, 139.5, 138.5, 135.9, 134.2, 132.2, 129.5, 129.0, 128.5, 128.2, 127.9, 127.4, 125.8, 124.7, 92.5. IR (neat,  $\text{cm}^{-1}$ ): 3057, 1778, 1592, 1443, 1244, 1074, 982, 736. HRMS (ESI) Calcd for  $\text{C}_{44}\text{H}_{26}\text{Cl}_2\text{NaO}_4$ :  $M+\text{Na} = 711.1100$ . Found: 711.1077.

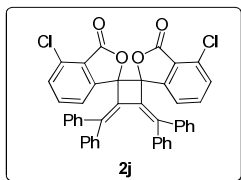

**3,4-bis(diphenylmethylene)-4',4''-dichloro-3',3''H-dispiro[cyclobutane-1,1':2,1''-diisobenzofunan]-3',3''-dione (2j)** The crude product was purified by flash chromatography (Hexanes:EtOAc = 4:1) to provide (93.4 mg, 67%) as a yellow solid.  $^1\text{H}$  NMR (400 MHz,  $\text{CDCl}_3$ )  $\delta$  ppm 7.74 (d,  $J = 7.6$  Hz, 2H), 7.50 (t,  $J = 7.6$  Hz, 2H), 7.31 (d,  $J = 8.0$  Hz, 2H), 7.14 (t,  $J = 7.6$  Hz, 2H), 7.05 (d,  $J = 7.6$  Hz, 4H), 7.01 (d,  $J = 7.2$  Hz, 2H), 6.98-6.92 (m, 4H), 6.82-6.78 (m, 8H).  $^{13}\text{C}$  NMR (100 MHz,  $\text{CDCl}_3$ )  $\delta$  ppm 165.1, 148.4, 142.4, 139.6, 138.4, 134.9, 132.5, 132.4, 130.8, 129.6, 128.9, 128.6, 128.5, 127.7, 127.3, 123.1, 123.0, 91.2. IR (neat,  $\text{cm}^{-1}$ ): 3032, 1770, 1583, 1442, 1240, 1068, 980, 745. HRMS (ESI) Calcd for  $\text{C}_{44}\text{H}_{26}\text{Cl}_2\text{NaO}_4$ :  $M+\text{Na} = 711.1100$ . Found: 711.1086.

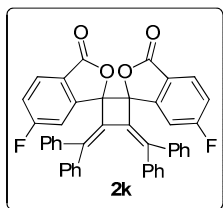

**3,4-bis(diphenylmethylene)-6',6''-difluoro-3',3''H-dispiro[cyclobutane-1,1':2,1''-diisobenzofunan]-3',3''-dione (2k)** The crude product was purified by flash chromatography (Hexanes:EtOAc = 4:1) to provide (94.9 mg, 72%) as a yellow solid.  $^1\text{H}$  NMR (400 MHz,  $\text{CDCl}_3$ )  $\delta$  ppm 7.52 (dd,  $J = 8.4, 4.8$  Hz, 2H), 7.47 (dd,  $J = 7.6, 2.0$  Hz, 2H), 7.14-7.05 (m, 10 H), 7.03-6.93 (m, 4 H), 6.86-6.80 (m, 8 H).  $^{13}\text{C}$  NMR (100 MHz,  $\text{CDCl}_3$ )  $\delta$  ppm 167.0, 166.2 (d,  $J = 255.4$  Hz), 149.1 (d,  $J = 10.5$  Hz), 142.5, 139.5, 138.5, 129.6, 129.0, 128.53, 128.47, 127.9, 127.4, 117.9 (d,  $J = 24.2$  Hz), 111.7 (d,  $J = 14.7$  Hz), 91.8. IR (neat,  $\text{cm}^{-1}$ ): 3058, 1776, 1603, 1482, 1273, 1075, 992, 731. HRMS (ESI) Calcd for  $\text{C}_{44}\text{H}_{26}\text{F}_2\text{NaO}_4$ :  $M+\text{Na} = 679.1691$ . Found: 679.1697.

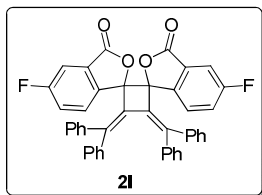

**3,4-bis(diphenylmethylene)-5',5''-difluoro-3',3''H-dispiro[cyclobutane-1,1':2,1''-diisobenzofunan]-3',3''-dione (2l)** The crude product was purified by flash chromatography (Hexanes:EtOAc = 4:1) to provide (74.9 mg, 57%) as a yellow solid.  $^1\text{H}$  NMR (400 MHz,  $\text{CDCl}_3$ )  $\delta$  ppm 7.75 (q,  $J$  = 4.0 Hz, 2H), 7.26 (dd,  $J$  = 6.4, 2.4 Hz, 2H), 7.25-7.16 (m, 2H), 7.15-7.08 (m, 2H), 7.03-6.95 (m, 10H), 6.86-6.81 (m, 8H).  $^{13}\text{C}$  NMR (100 MHz,  $\text{CDCl}_3$ )  $\delta$  ppm 167.0 (d,  $J$  = 4.0 Hz), 163.2 (d,  $J$  = 249.5 Hz), 142.5, 141.2, 139.6, 138.6, 129.6, 129.0, 128.5, 128.4, 127.8, 127.4, 121.9 (d,  $J$  = 23.8 Hz), 111.1 (d,  $J$  = 23.7 Hz), 92.7. IR (neat,  $\text{cm}^{-1}$ ): 3075, 1768, 1599, 1485, 1263, 1093, 910, 747. HRMS (ESI) Calcd for  $\text{C}_{44}\text{H}_{26}\text{F}_2\text{NaO}_4$ :  $\text{M}+\text{Na}$  = 679.1691. Found: 679.1686.

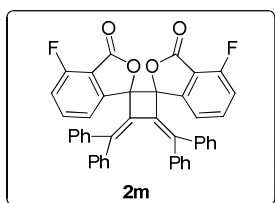

**3,4-bis(diphenylmethylene)-4',4''-difluoro-3',3''H-dispiro[cyclobutane-1,1':2,1''-diisobenzofunan]-3',3''-dione (2m)** The crude product was purified by flash chromatography (Hexanes:EtOAc = 4:1) to provide (87.1 mg, 66%) as a yellow solid.  $^1\text{H}$  NMR (400 MHz,  $\text{CDCl}_3$ )  $\delta$  ppm 7.61-7.55 (m, 4H), 7.16-7.12 (m, 2H), 7.05 (d,  $J$  = 8.0 Hz, 4H), 7.08-6.97 (m, 3H), 6.96-6.93 (m, 5H), 6.85-6.79 (m, 8H).  $^{13}\text{C}$  NMR (100 MHz,  $\text{CDCl}_3$ )  $\delta$  ppm 164.2 (d,  $J$  = 2.7 Hz), 158.7 (d,  $J$  = 263.3 Hz), 148.4, 142.4, 139.6, 138.5, 129.6, 129.0, 128.6, 128.5, 127.8, 127.4, 120.6 (d,  $J$  = 4.3 Hz), 116.4 (d,  $J$  = 18.5 Hz), 114.1 (d,  $J$  = 14.3 Hz), 92.2. IR (neat,  $\text{cm}^{-1}$ ): 3053, 1747, 1586, 1453, 1244, 1090, 913, 745. HRMS (ESI) Calcd for  $\text{C}_{44}\text{H}_{26}\text{F}_2\text{NaO}_4$ :  $\text{M}+\text{Na}$  = 679.1691. Found: 679.1697.

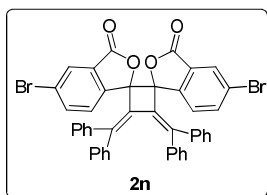

**3,4-bis(diphenylmethylene)-5',5''-dibromo-3',3''H-dispiro[cyclobutane-1,1':2,1''-diisobenzofunan]-3',3''-dione (2n)** The crude product was purified by flash chromatography (Hexanes:EtOAc = 4:1) to provide (122.4 mg, 78%) as a yellow

**solid.**  $^1\text{H}$  NMR (400 MHz,  $\text{CDCl}_3$ )  $\delta$  ppm 7.69-7.63 (m, 6H), 7.13 (t,  $J = 7.6$  Hz, 2H), 7.05-6.94 (m, 10H), 6.82 (t,  $J = 8.0$  Hz, 8H);  $^{13}\text{C}$  NMR (100 MHz,  $\text{CDCl}_3$ )  $\delta$  ppm 166.6, 144.6, 142.5, 139.5, 138.5, 137.1, 132.1, 129.6, 129.0, 128.6, 128.5, 128.4, 127.9, 127.8, 127.4, 126.0, 123.7, 92.5. IR (neat,  $\text{cm}^{-1}$ ): 3062, 1768, 1598, 1417, 1208, 1100, 987, 742. HRMS (ESI) Calcd for  $\text{C}_{44}\text{H}_{26}\text{Br}_2\text{Na O}_4$ :  $M+\text{Na} = 799.0090$ . Found: 799.0101.

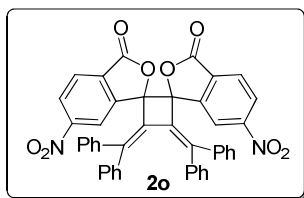

**3,4-bis(diphenylmethylene)-6',6''-dinitro-3',3''-H-dispiro[cyclobutane-1,1':2,1''-diisobenzofuran]-3',3''-dione (2o)** The crude product was purified by flash chromatography (Hexanes:EtOAc = 3:1) to provide (78.4 mg, 54%) as a yellow solid.  $^1\text{H}$  NMR (400 MHz,  $\text{CDCl}_3$ )  $\delta$  ppm 8.55 (s, 2H), 8.17 (d,  $J = 8.4$  Hz, 2H), 7.61 (d,  $J = 8.4$  Hz, 2H), 7.07-6.91 (m, 16H), 6.83 (t,  $J = 7.6$  Hz, 4H).  $^{13}\text{C}$  NMR (100 MHz,  $\text{CDCl}_3$ )  $\delta$  ppm 165.7, 151.3, 146.1, 144.0, 139.1, 138.3, 131.3, 131.2, 129.7, 129.1, 129.0, 128.7, 128.0, 127.4, 126.1, 125.0, 120.3, 92.7. IR (neat,  $\text{cm}^{-1}$ ): 3058, 1780, 1535, 1337, 1241, 1037, 990, 702. HRMS (ESI) Calcd for  $\text{C}_{44}\text{H}_{26}\text{N}_2\text{NaO}_8$ :  $M+\text{Na} = 733.1581$ . Found: 733.1602.

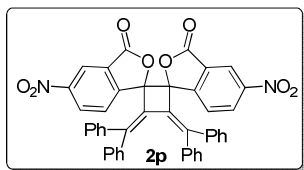

**3,4-bis(diphenylmethylene)-5',5''-dinitro-3',3''-H-dispiro[cyclobutane-1,1':2,1''-diisobenzofuran]-3',3''-dione (2p)** The crude product was purified by flash chromatography (Hexanes:EtOAc = 3:1) to provide (80.7 mg, 56%) as a yellow solid.  $^1\text{H}$  NMR (400 MHz,  $\text{CDCl}_3$ )  $\delta$  ppm 8.41 (dd,  $J = 8.4, 2.0$  Hz, 2H), 8.27 (d,  $J = 1.6$  Hz, 2H), 7.97 (d,  $J = 8.8$  Hz, 2H), 7.11-7.08 (m, 2H), 7.04-6.99 (m, 6H), 6.93 (d,  $J = 7.6$  Hz, 4H), 6.88-6.81 (m, 8H).  $^{13}\text{C}$  NMR (100 MHz,  $\text{CDCl}_3$ )  $\delta$  ppm 165.5, 150.3, 149.1, 143.9, 139.1, 138.3, 131.3, 129.7, 129.1, 129.0, 128.9, 128.6, 128.2, 128.1, 127.5, 126.2, 120.4, 92.9. IR (neat,  $\text{cm}^{-1}$ ): 3080, 1785, 1614, 1527, 1444, 1242, 987, 727. HRMS (ESI) Calcd for  $\text{C}_{44}\text{H}_{26}\text{N}_2\text{NaO}_8$ :  $M+\text{Na} = 733.1581$ . Found: 733.1585.

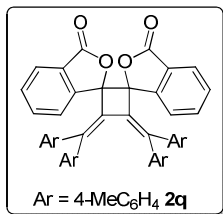



**3,4-bis(di-*p*-tolylmethylene)-3',3''*H*-dispiro[cyclobutane-1,1':2,1''-diisobenzofunan]-3',3''-dione (2q)** The crude product was purified by flash chromatography (Hexanes:EtOAc = 4:1) to provide (113.8 mg, 84%) as a yellow solid. <sup>1</sup>H NMR (400 MHz, CDCl<sub>3</sub>) δ ppm 7.84 (d, *J* = 7.6 Hz, 2H), 7.61-7.57 (m, 2H), 7.53 (d, *J* = 7.6 Hz, 2H), 7.40-7.37 (m, 2H), 6.81-6.76 (m, 8H), 6.67 (d, *J* = 7.6 Hz, 4H), 6.58 (d, *J* = 8.0 Hz, 4H), 2.18 (s, 6H), 2.15 (s, 6H). <sup>13</sup>C NMR (100 MHz, CDCl<sub>3</sub>) δ ppm 168.7, 147.2, 141.0, 138.1, 138.0, 137.4, 136.1, 133.9, 131.8, 129.5, 129.2, 129.0, 128.3, 127.8, 126.3, 124.7, 124.5, 92.5, 21.1, 21.0. IR (neat, cm<sup>-1</sup>): 3019, 1772, 1610, 1509, 1284, 1065, 974, 726. HRMS (ESI) Calcd for C<sub>48</sub>H<sub>36</sub>NaO<sub>4</sub>: M+Na = 699.2506. Found: 699.2499.

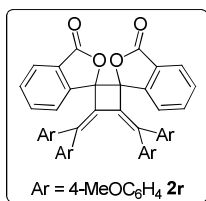

**3,4-bis(di-(4-methoxyphenyl)methylene)-3',3''*H*-dispiro[cyclobutane-1,1':2,1''-diisobenzofunan]-3',3''-dione (2r)** The crude product was purified by flash chromatography (Hexanes:EtOAc = 1:1) to provide (117.3 mg, 79%) as a yellow solid. <sup>1</sup>H NMR (400 MHz, CDCl<sub>3</sub>) δ ppm 7.79 (d, *J* = 8.0 Hz, 2H), 7.56 (t, *J* = 7.6 Hz, 2H), 7.51 (d, *J* = 7.6 Hz, 2H), 7.35 (t, *J* = 7.6 Hz, 2H), 6.85 (d, *J* = 8.8 Hz, 4H), 6.75 (d, *J* = 8.4 Hz, 4H), 6.48 (d, *J* = 8.8 Hz, 4H), 6.33 (d, *J* = 9.2 Hz, 4H), 3.68 (s, 6H), 3.67 (s, 6H). <sup>13</sup>C NMR (100 MHz, CDCl<sub>3</sub>) δ ppm 168.8, 160.1, 159.4, 139.9, 133.8, 132.9, 131.4, 131.0, 130.6, 129.2, 126.6, 124.7, 113.2, 112.5, 92.9, 55.2, 55.1. IR (neat, cm<sup>-1</sup>): 3024, 1769, 1594, 1463, 1234, 1047, 969, 721. HRMS (ESI) Calcd for C<sub>48</sub>H<sub>36</sub>NaO<sub>8</sub>: M+Na = 763.2302. Found: 763.2296.

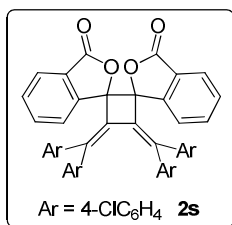

**3,4-bis(di-(4-chlorophenyl)methylene)-3',3''*H*-dispiro[cyclobutane-1,1':2,1''-diisobenzofunan]-3',3''-dione (2s)** The crude product was purified by flash chromatography (Hexanes:EtOAc = 4:1) to provide (107.8 mg, 71%) as a yellow solid. <sup>1</sup>H NMR (400 MHz, CDCl<sub>3</sub>) δ ppm 7.72 (d, *J* = 8.0 Hz, 2H), 7.59-7.54 (m, 4H), 7.40 (t, *J* = 7.6 Hz, 2H), 6.94-6.85 (m, 12H), 6.73 (d, *J* = 8.0 Hz, 4H). <sup>13</sup>C NMR (100 MHz, CDCl<sub>3</sub>) δ ppm 168.1, 144.8, 140.1, 137.7, 136.4, 135.1, 134.9, 134.4, 134.2, 130.7, 130.4, 129.9, 128.1, 128.0, 126.6, 125.1, 124.7, 92.6. IR (neat, cm<sup>-1</sup>): 3063,

1778, 1593, 1488, 1283, 1092, 971, 785. HRMS (ESI) Calcd for C<sub>44</sub>H<sub>24</sub>O<sub>4</sub>NaCl<sub>4</sub>: M+Na = 779.0321. Found: 779.0336.

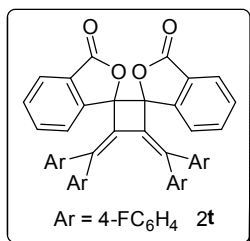

**3,4-bis(di-(4-fluorophenyl)methylene)-3',3''*H*-dispiro[cyclobutane-1,1':2,1''-diisobenzofuran]-3',3''-dione (2t)** The crude product was purified by flash chromatography (Hexanes:EtOAc = 4:1) to provide (124.1 mg, 89%) as a yellow solid. <sup>1</sup>H NMR (400 MHz, CDCl<sub>3</sub>) δ ppm 7.74 (d, *J* = 8.0 Hz, 2H), 7.57-7.54 (m, 4H), 7.41-7.37 (m, 2H), 6.98-6.95 (m, 4H), 6.77-6.76 (m, 4H), 6.67-6.60 (m, 8H). <sup>13</sup>C NMR (100 MHz, CDCl<sub>3</sub>) δ ppm 168.2, 162.9 (d, *J* = 249.2 Hz), 162.7 (d, *J* = 248.5 Hz), 145.1, 139.9, 135.7, 135.6, 134.4, 134.3, 134.1, 133.5, 131.2 (d, *J* = 8.2 Hz), 130.9 (d, *J* = 8.4 Hz), 129.8, 128.5, 126.9, 126.5, 125.1, 124.7, 114.9 (d, *J* = 21.7 Hz), 114.7 (d, *J* = 21.8 Hz), 92.7. IR (neat, cm<sup>-1</sup>): 2934, 1767, 1590, 1499, 1220, 1147, 976, 731. HRMS (ESI) Calcd for C<sub>44</sub>H<sub>24</sub>O<sub>4</sub>NaF<sub>4</sub>: M+Na = 715.1503. Found: 715.1510.

## Crystallographic data of 2a

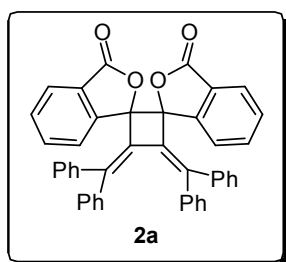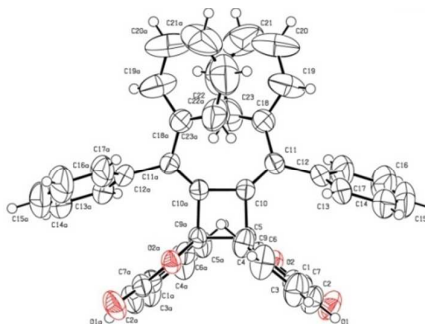

## Datablock:

|                    |                                             |                    |
|--------------------|---------------------------------------------|--------------------|
| Bond precision:    | C-C = 0.0031 Å                              | Wavelength=0.71073 |
| Cell:              | a=7.9399(4)    b=20.8101(7)    c=19.6719(6) |                    |
|                    | alpha=90    beta=90    gamma=90             |                    |
| Temperature: 291 K |                                             |                    |
|                    | Calculated                                  | Reported           |
| Volume             | 3250.4(2)                                   | 3250.4(2)          |

|                                                    |                                 |              |
|----------------------------------------------------|---------------------------------|--------------|
| Space group                                        | P b c n                         | P b c n      |
| Hall group                                         | -P 2n 2ab                       | -P 2n 2ab    |
| Moiety formula                                     | C44 H28 O4                      | C44 H28 O4   |
| Sum formula                                        | C44 H28 O4                      | C44 H28 O4   |
| Mr                                                 | 620.66                          | 620.66       |
| Dx, g cm <sup>-3</sup>                             | 1.268                           | 1.268        |
| Z                                                  | 4                               | 4            |
| Mu (mm <sup>-1</sup> )                             | 0.080                           | 0.080        |
| F000                                               | 1296.0                          | 1296.0       |
| F000'                                              | 1296.59                         |              |
| h, k, lmax                                         | 9, 25, 24                       | 9, 25, 24    |
| Nref                                               | 3205                            | 3199         |
| Tmin, Tmax                                         | 0.973, 0.978                    | 0.929, 1.000 |
| Tmin'                                              | 0.973                           |              |
| Correction method= # Reported T Limits: Tmin=0.929 |                                 |              |
| Tmax=1.000 AbsCorr = MULTI-SCAN                    |                                 |              |
| Data completeness= 0.998                           | Theta(max)= 26.020              |              |
| R(reflections)= 0.0529( 2220)                      | wR2(reflections)= 0.1201( 3199) |              |
| S = 1.073                                          | Npar= 218                       |              |



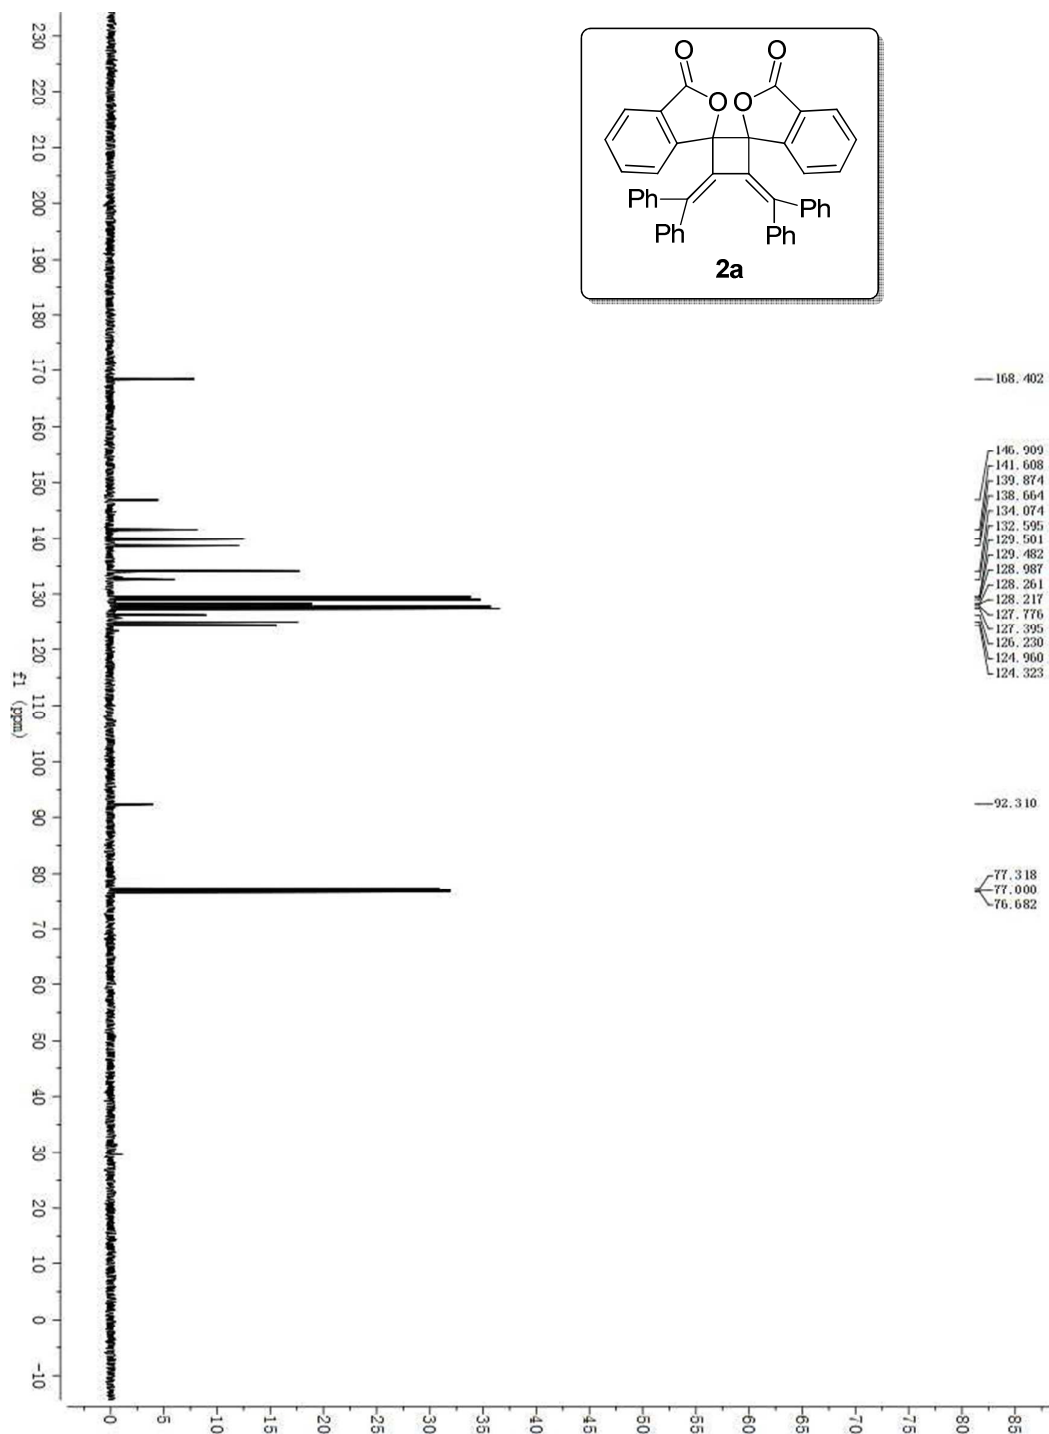

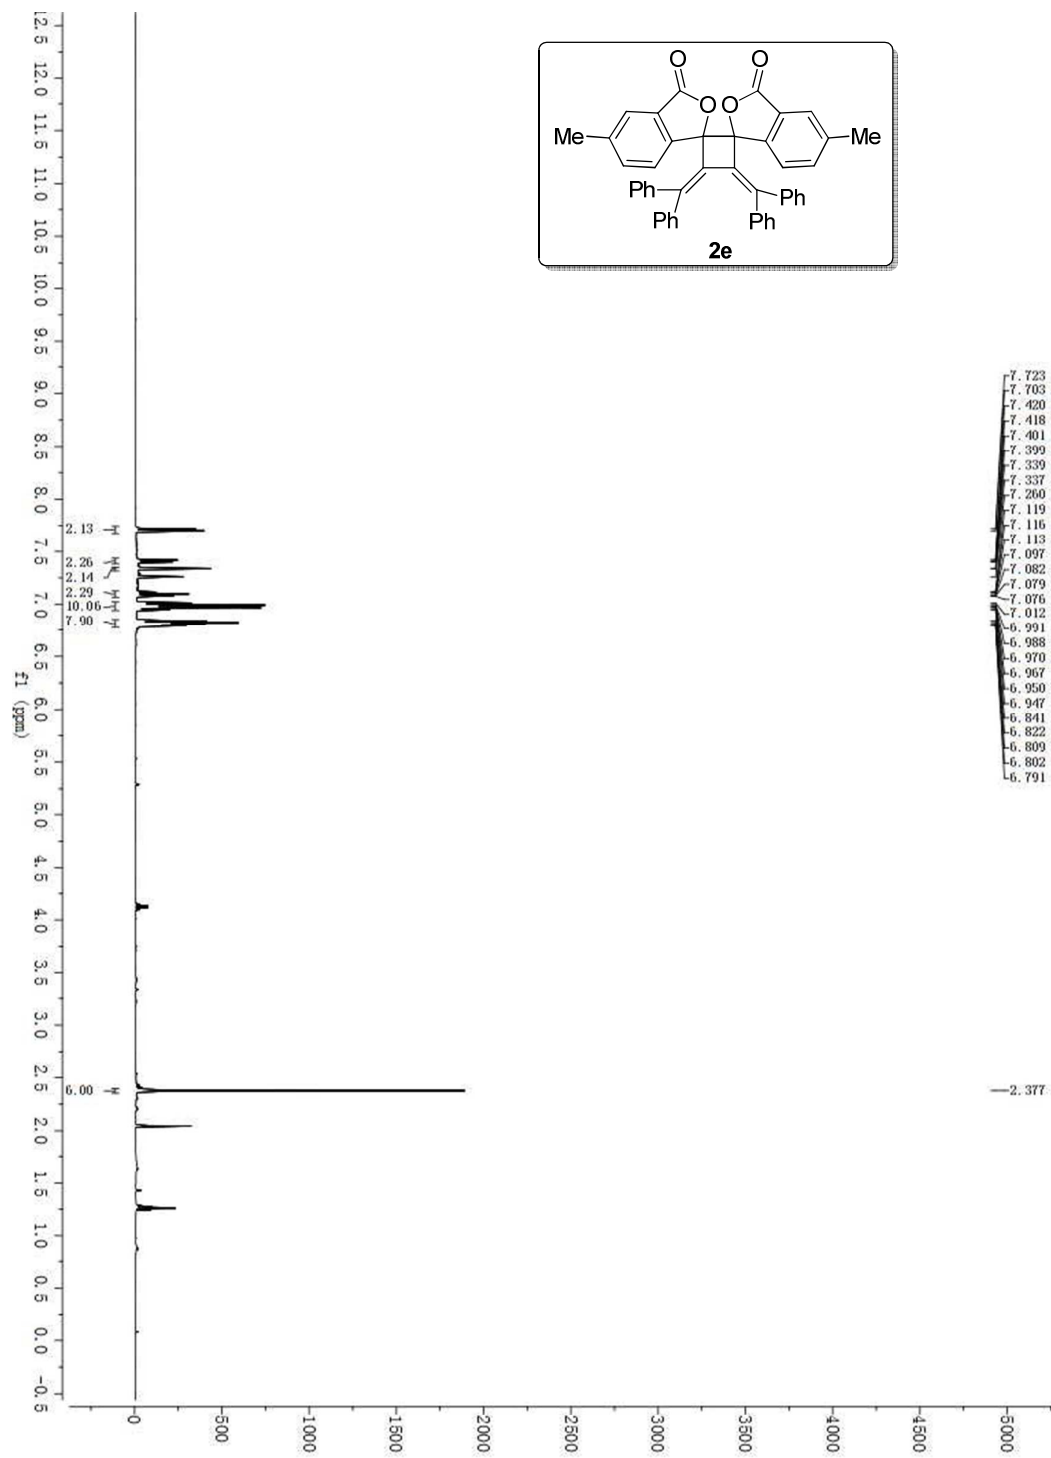

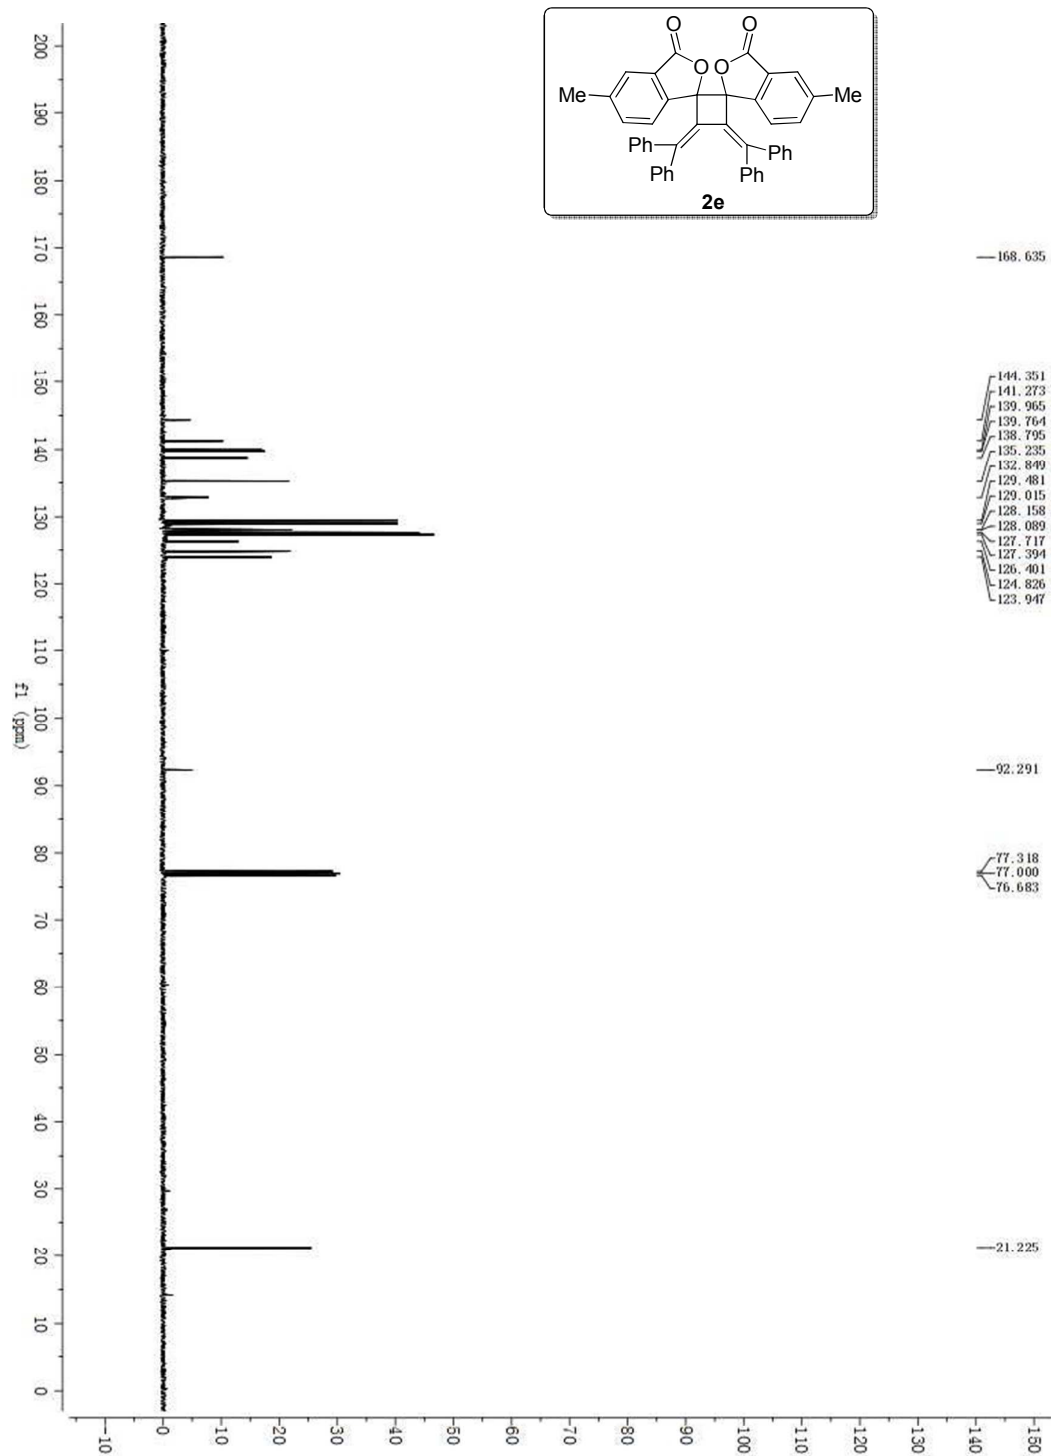

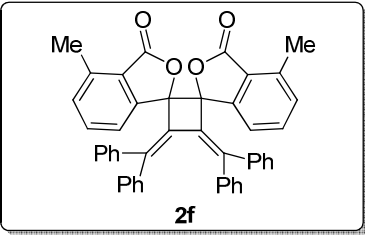



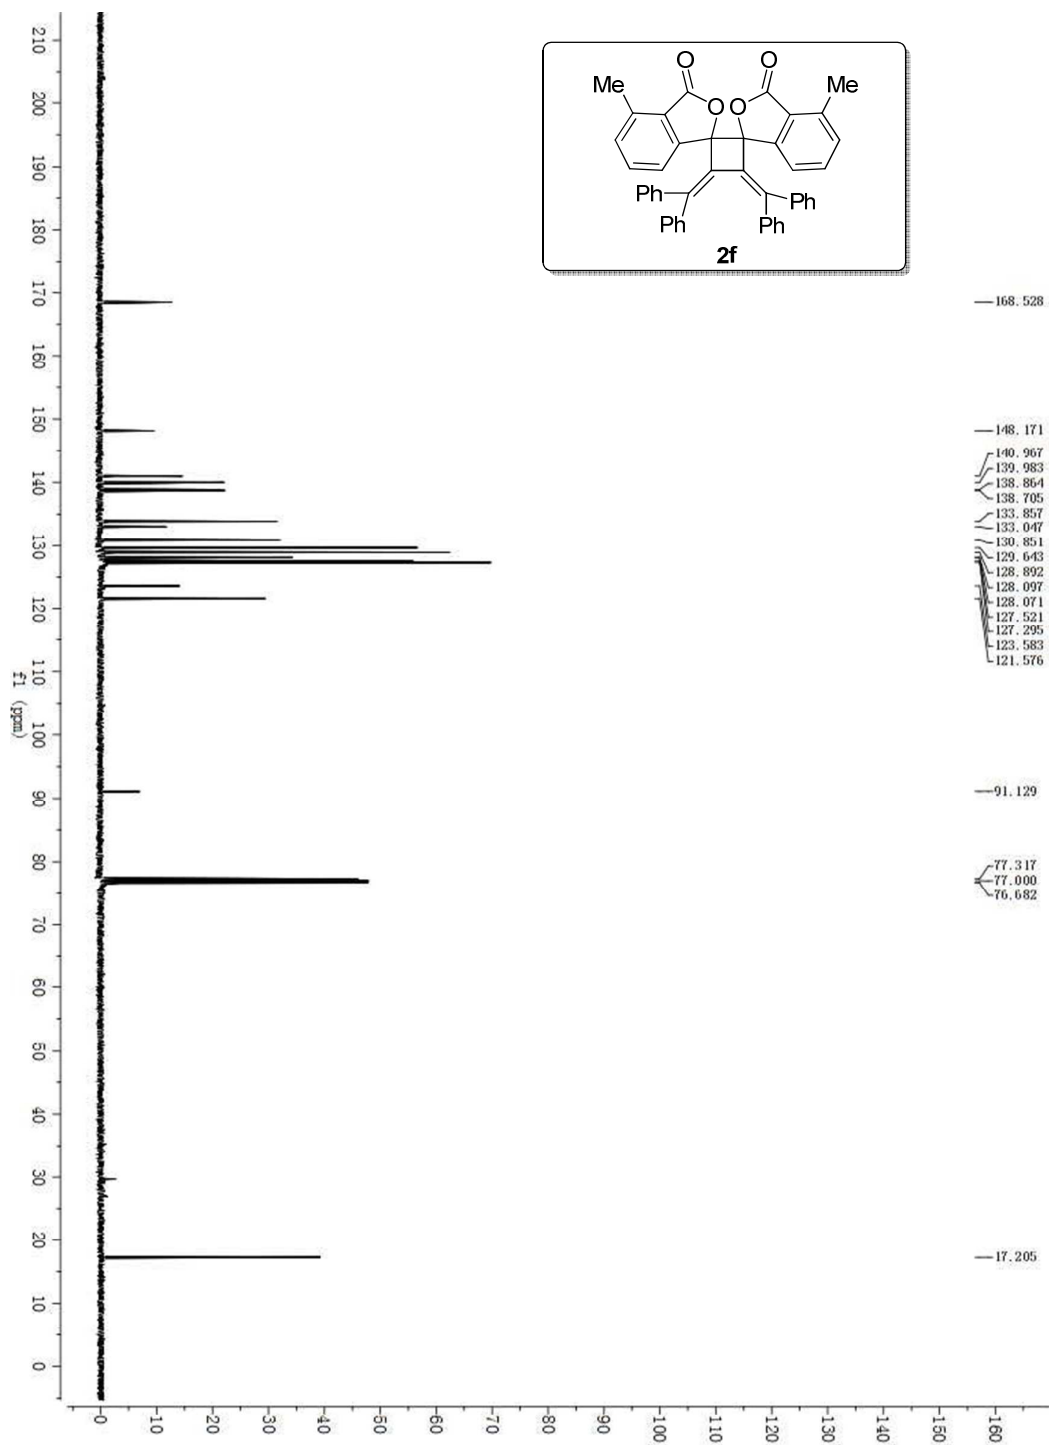

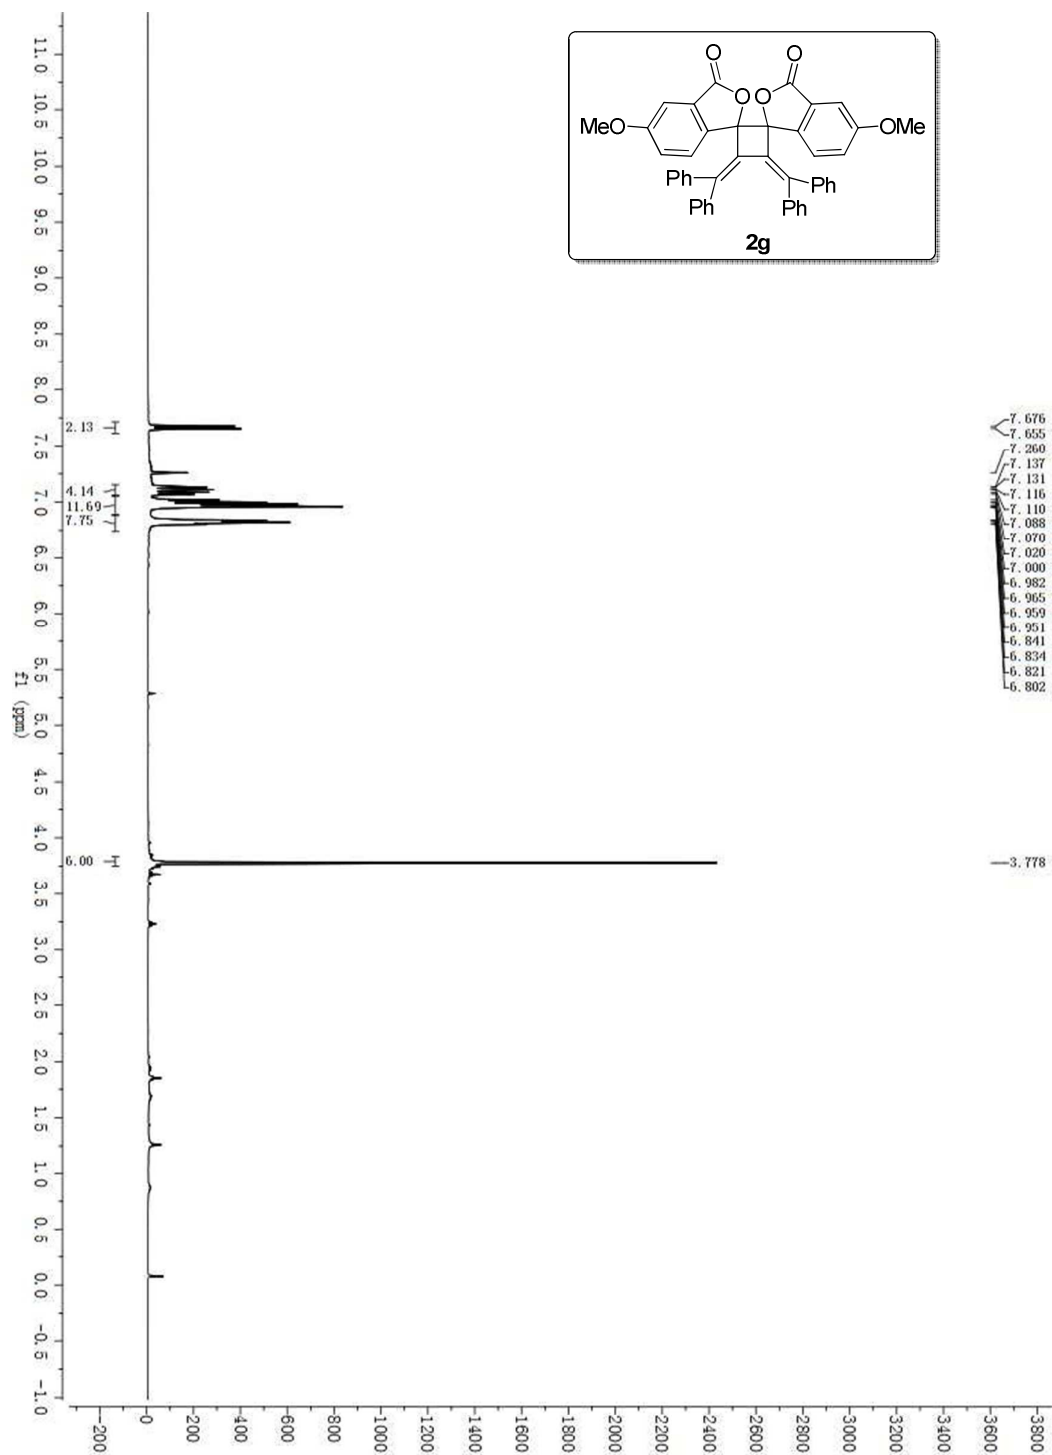

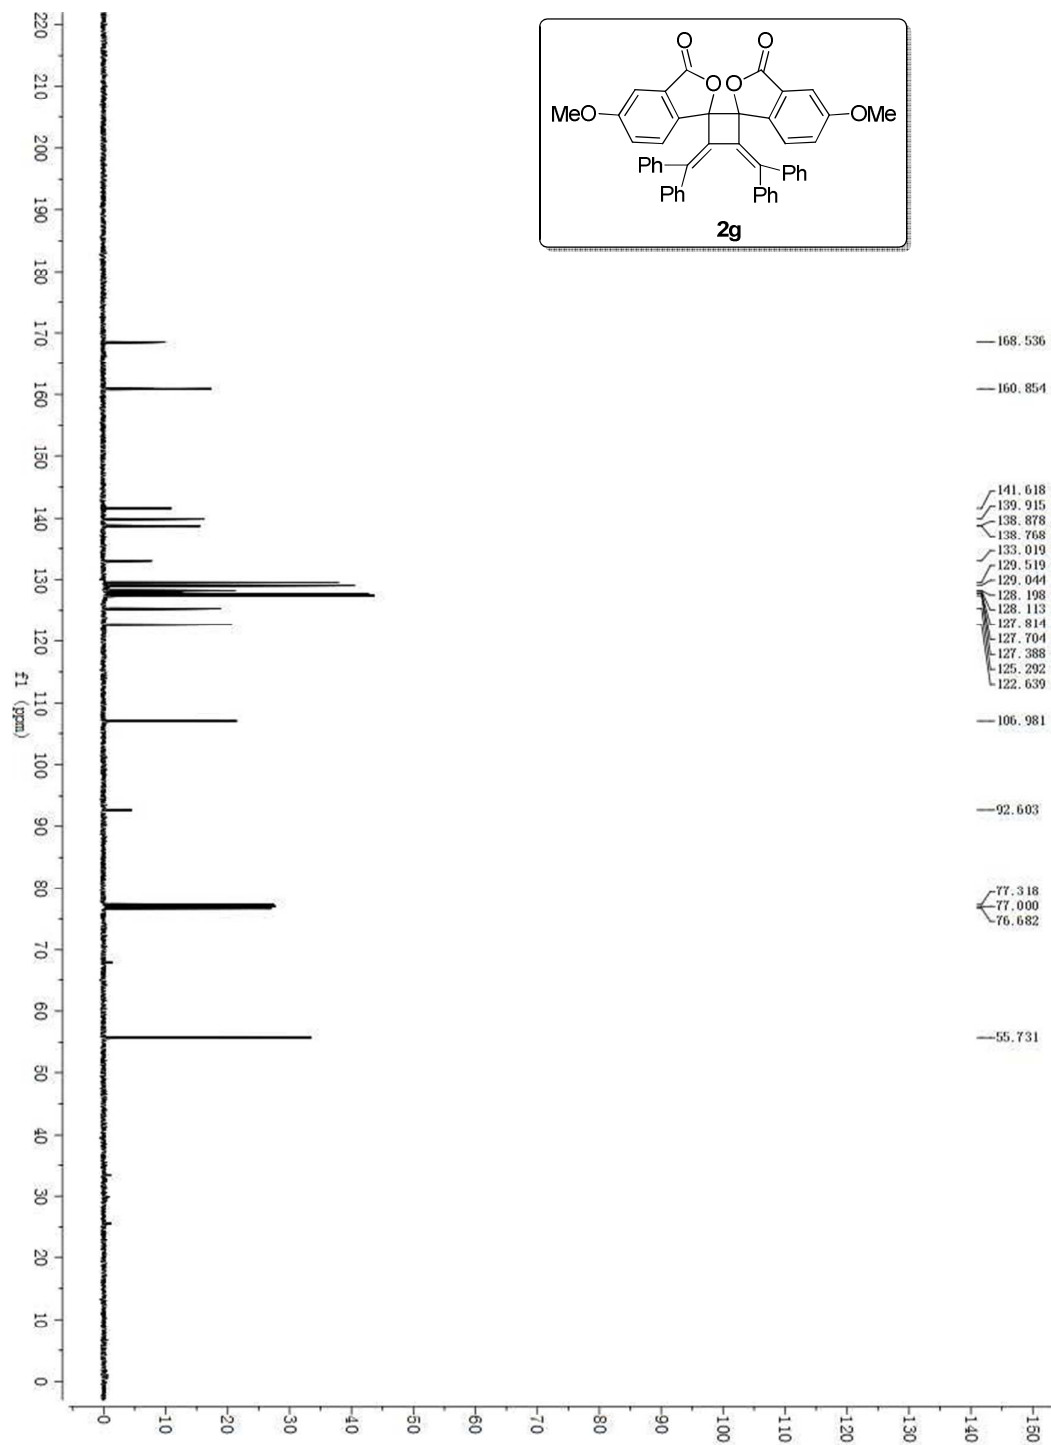



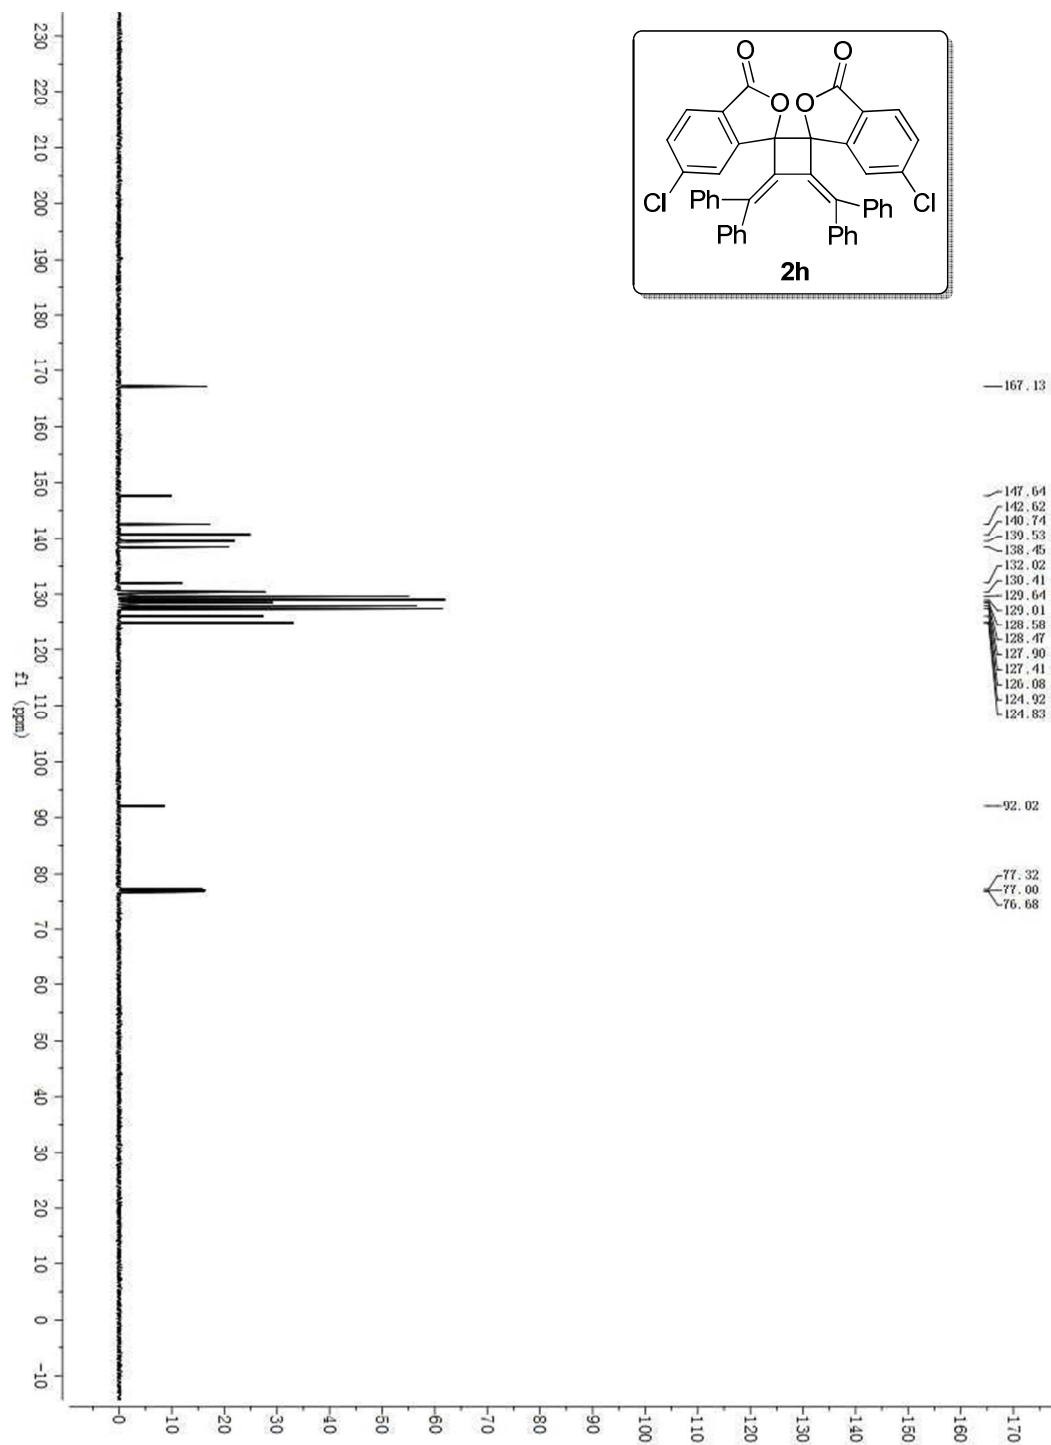

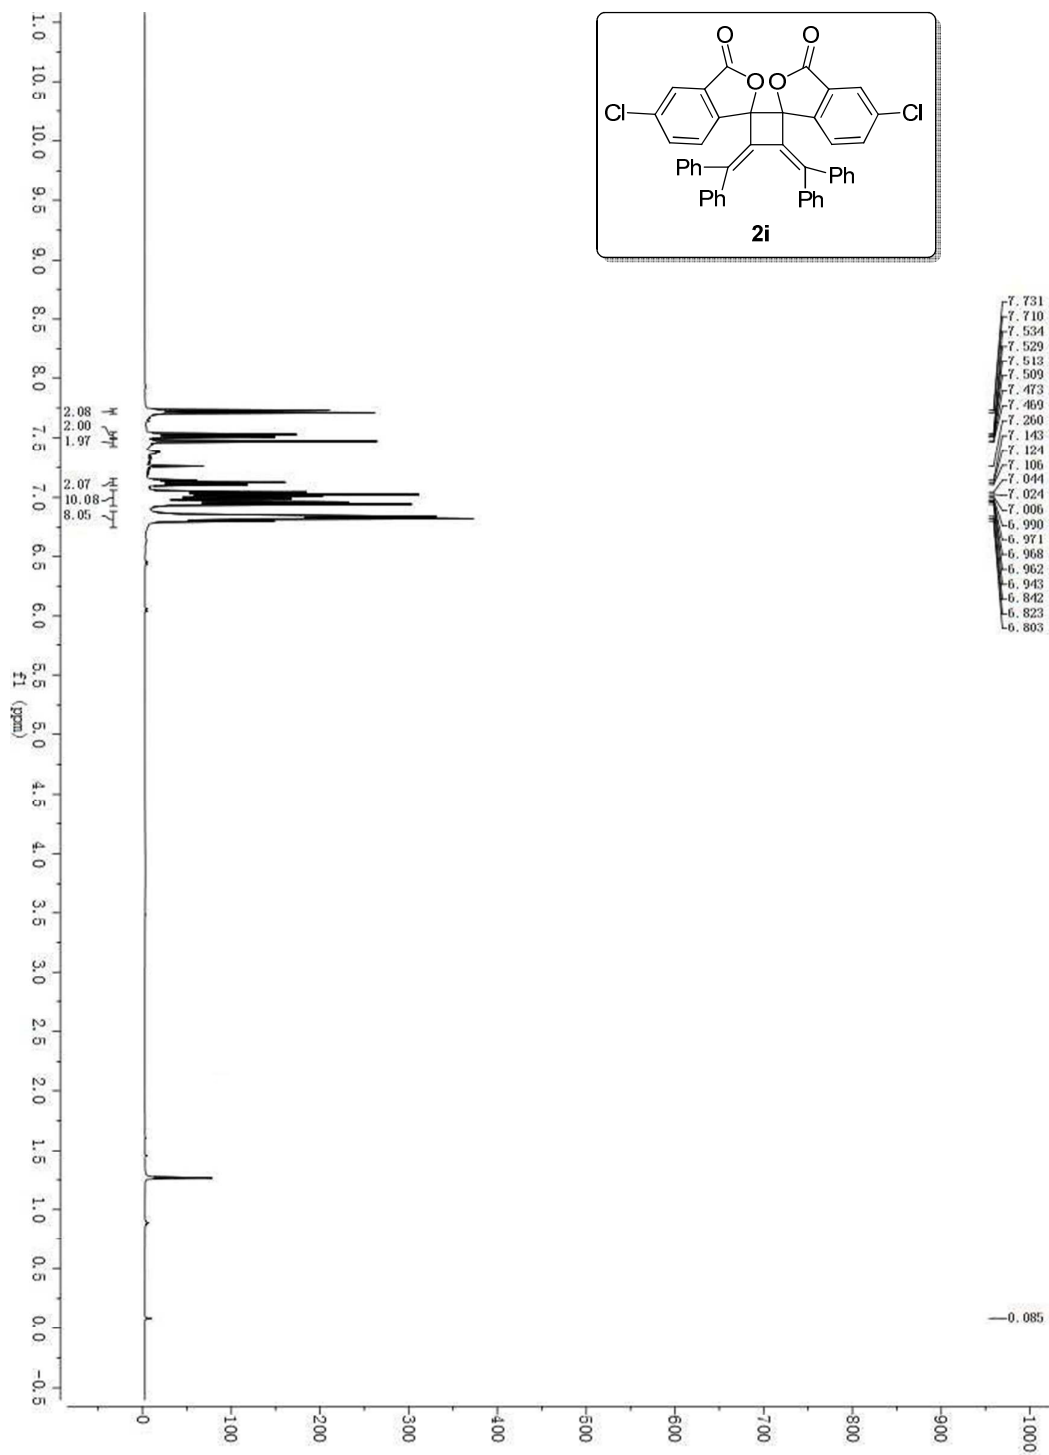



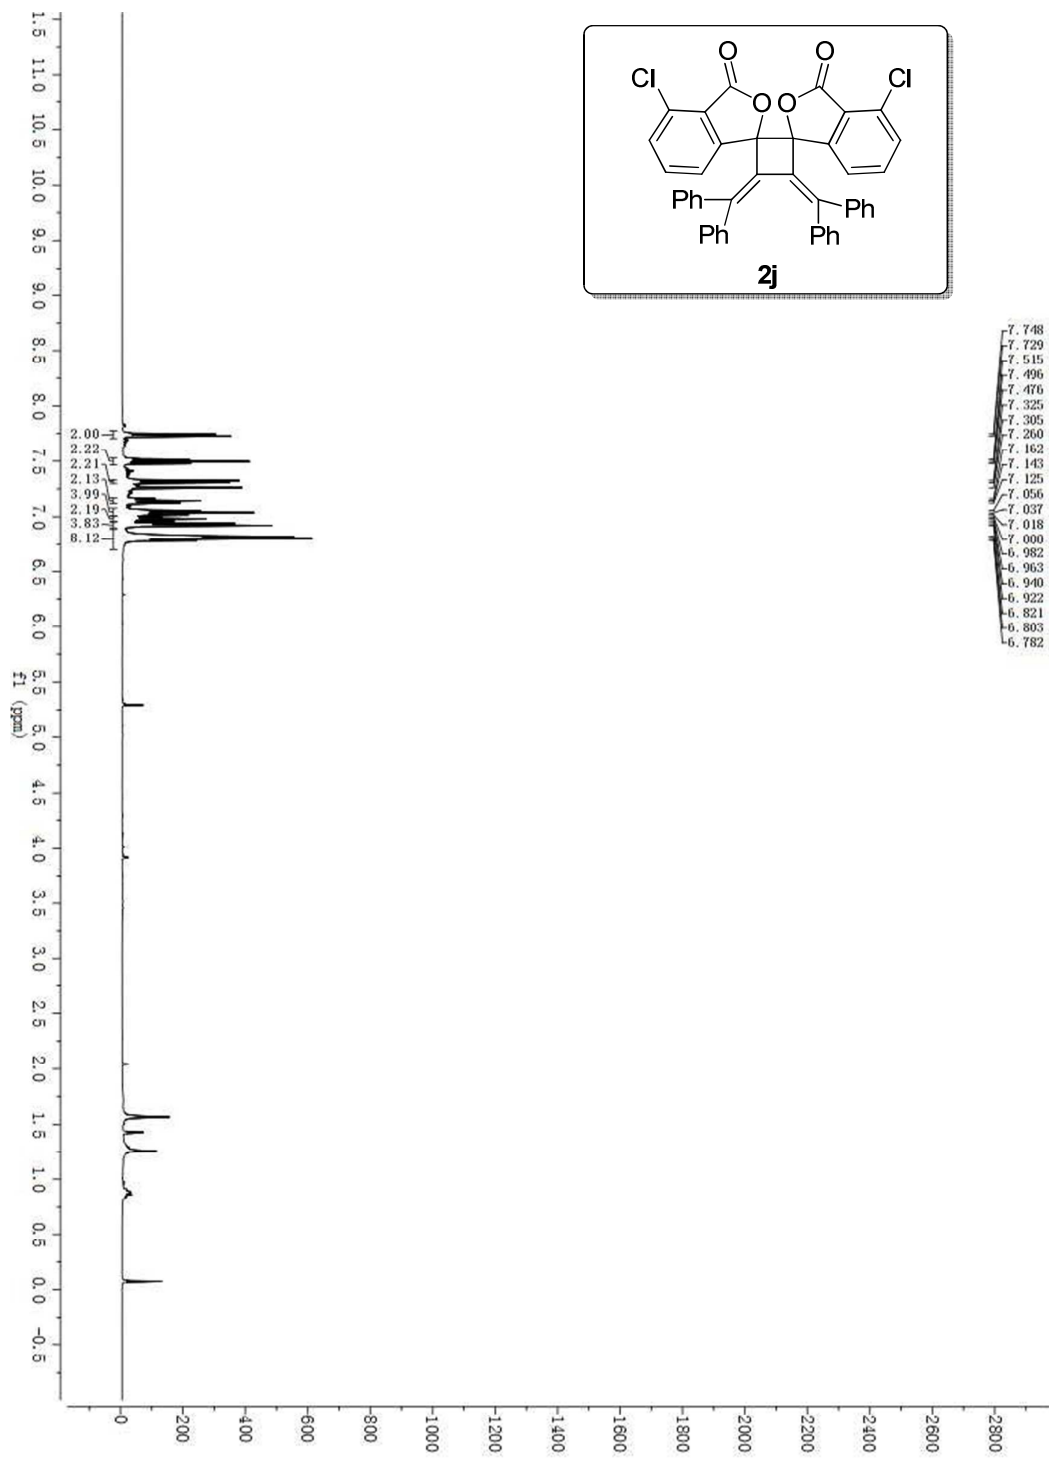



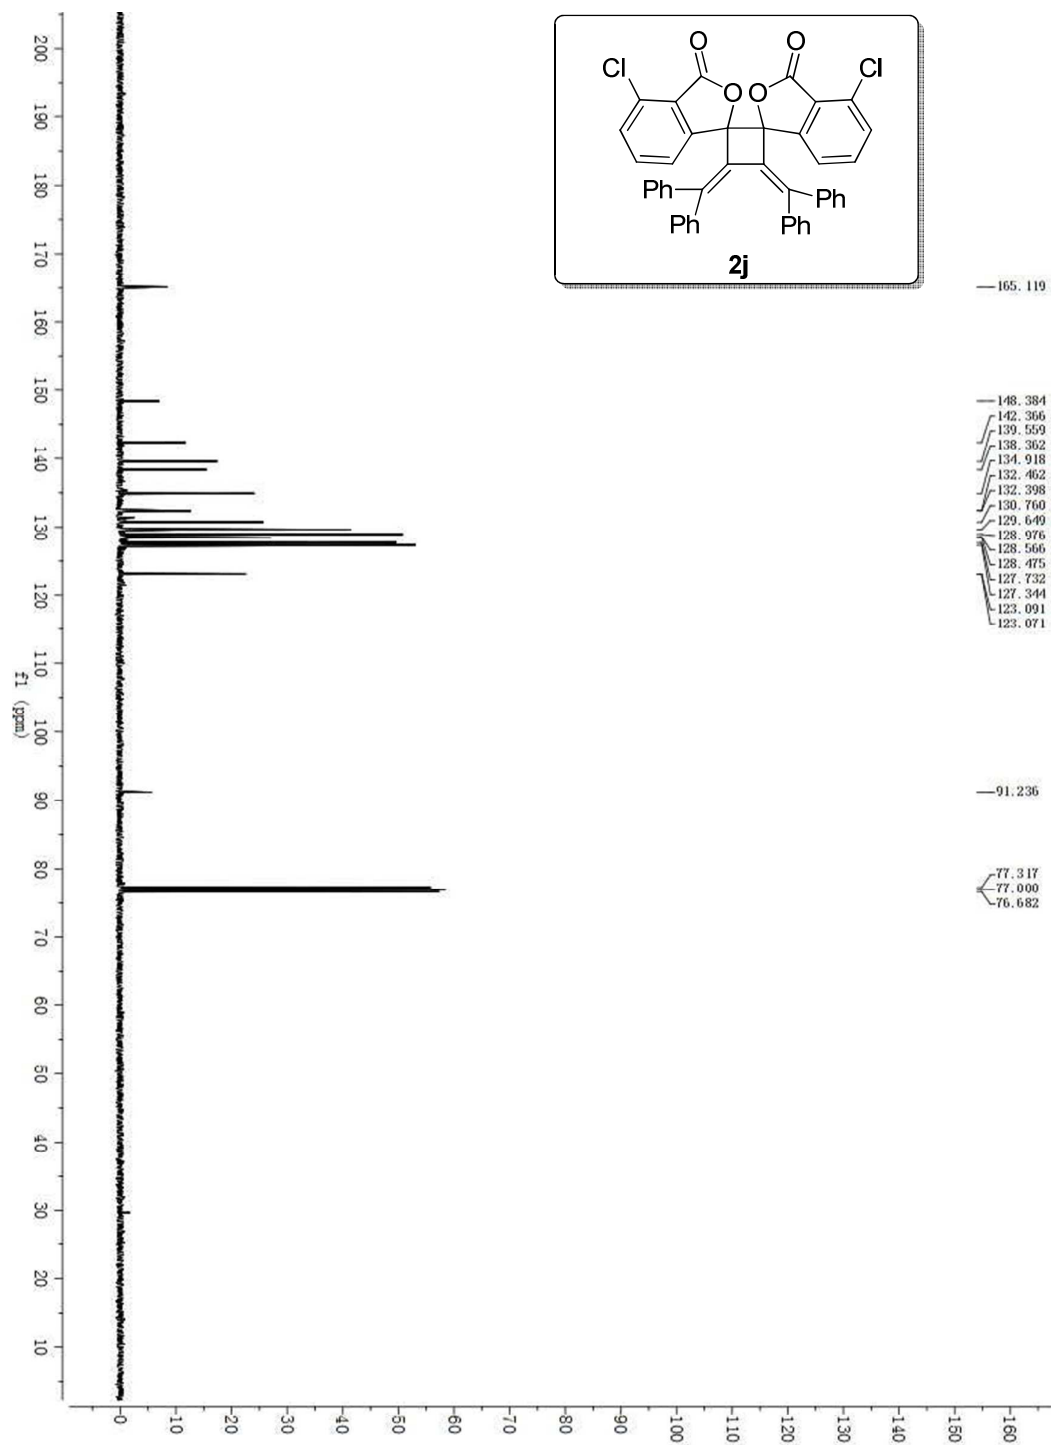



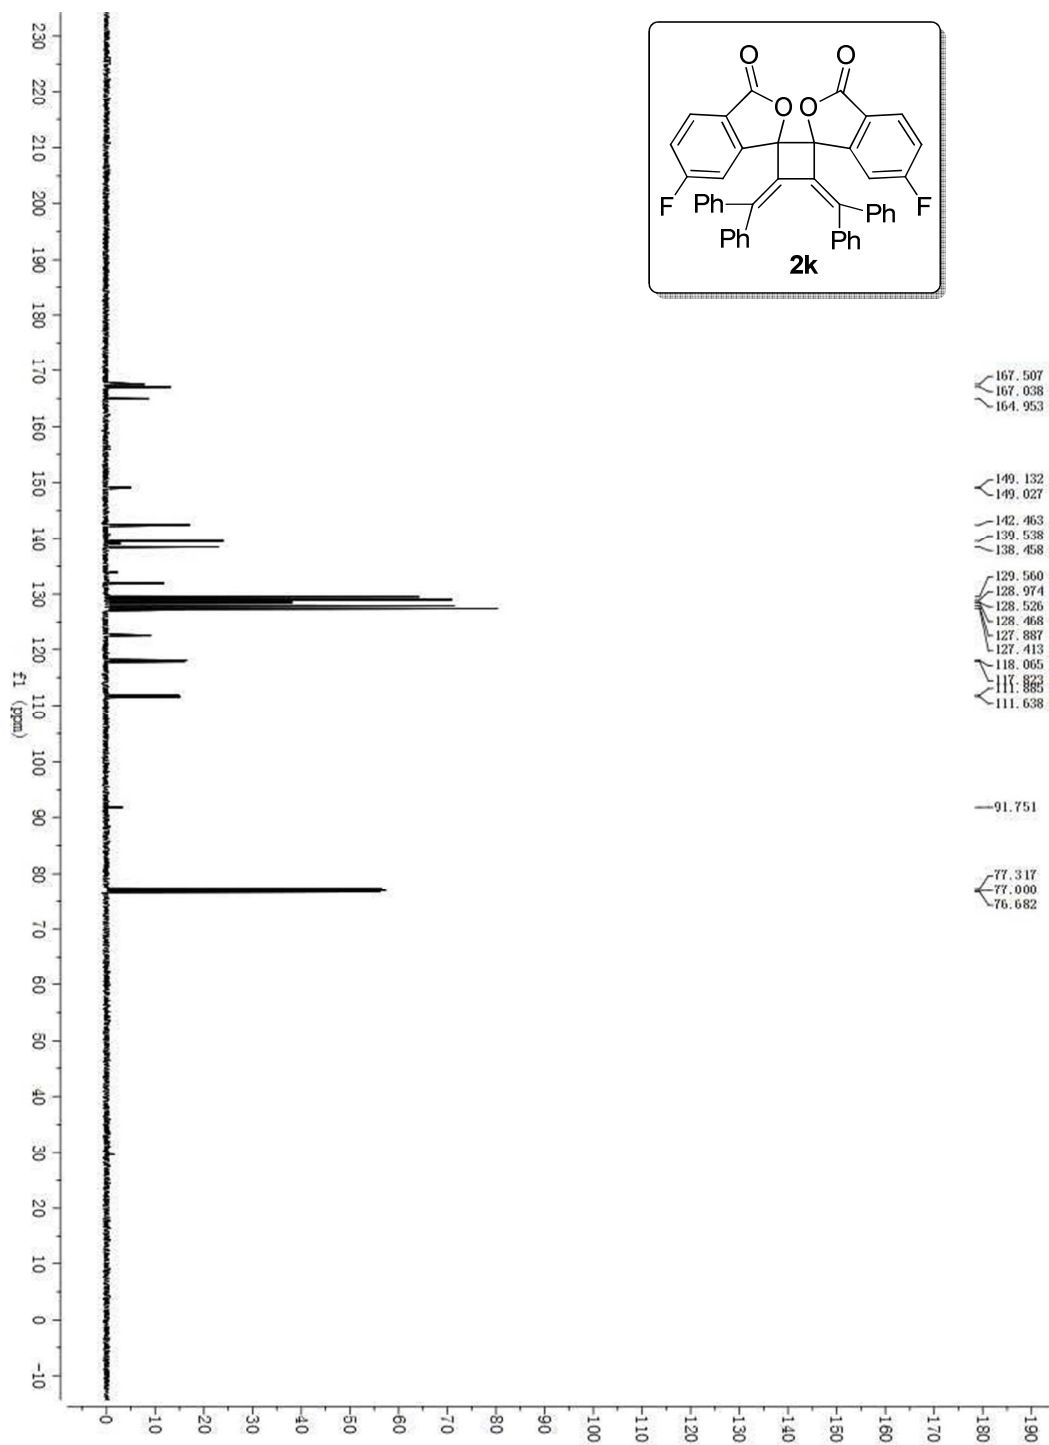

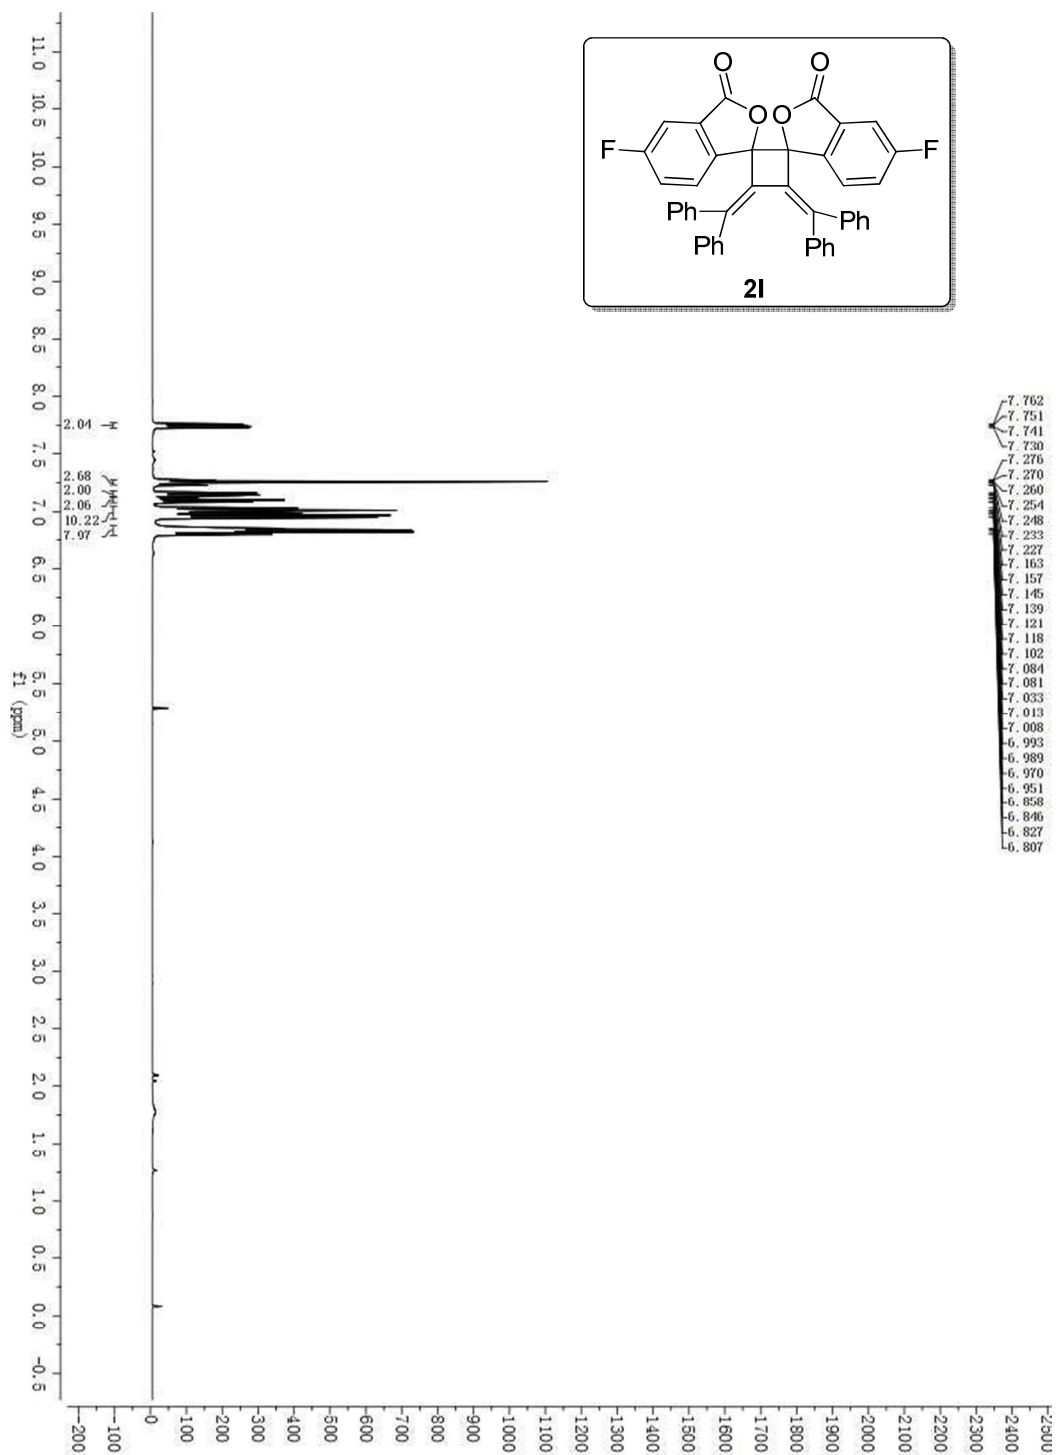

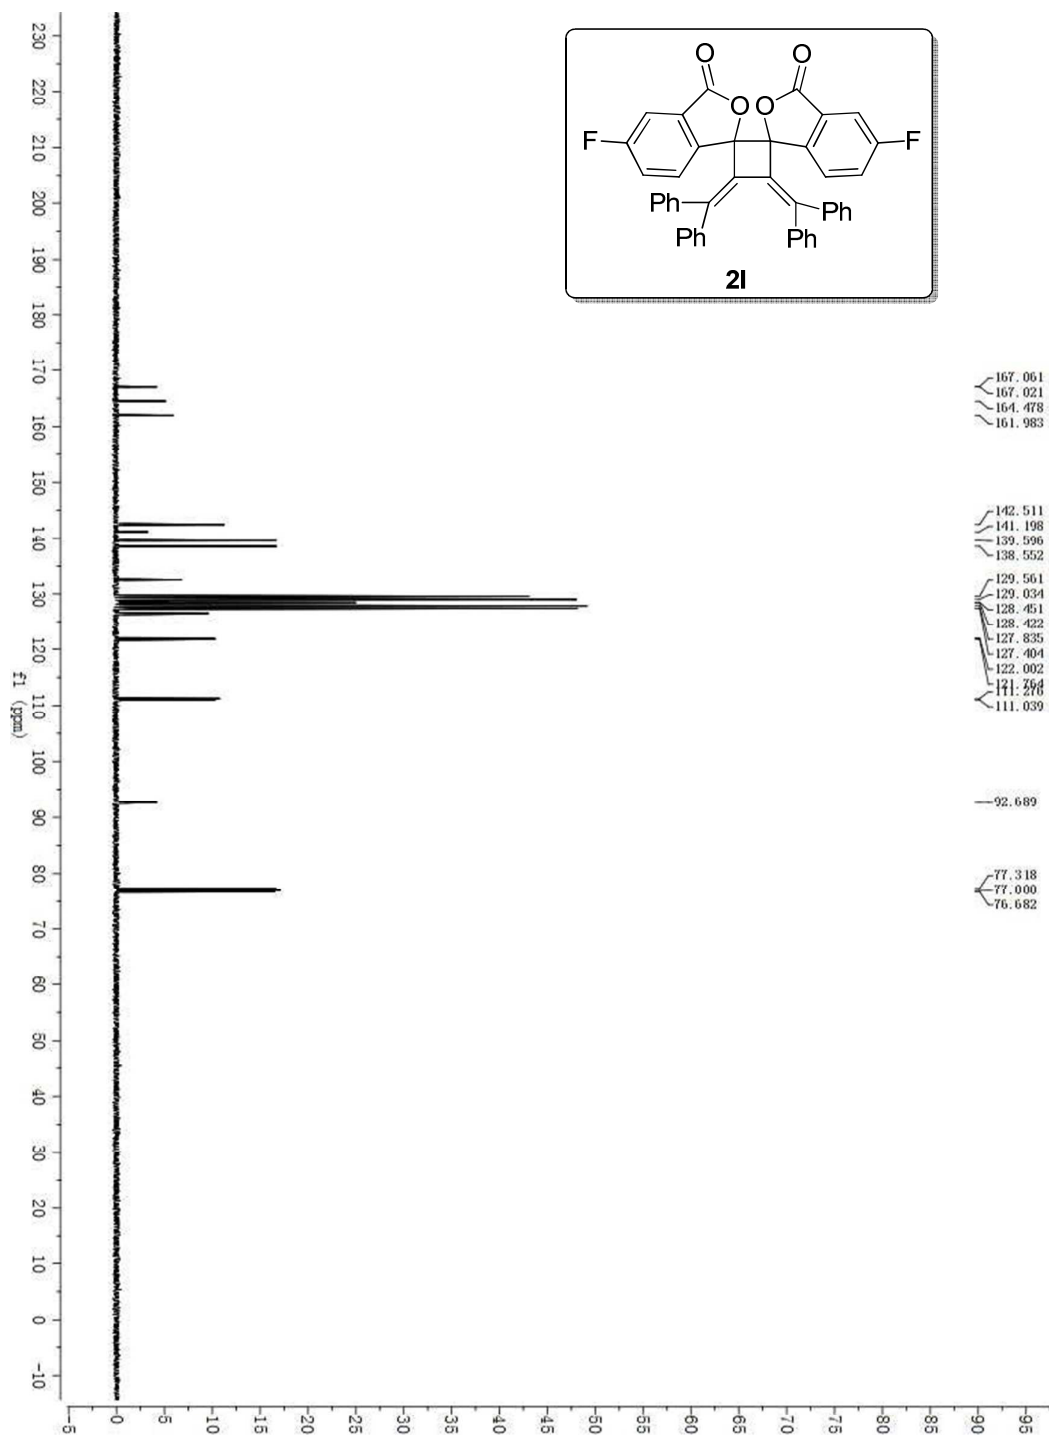

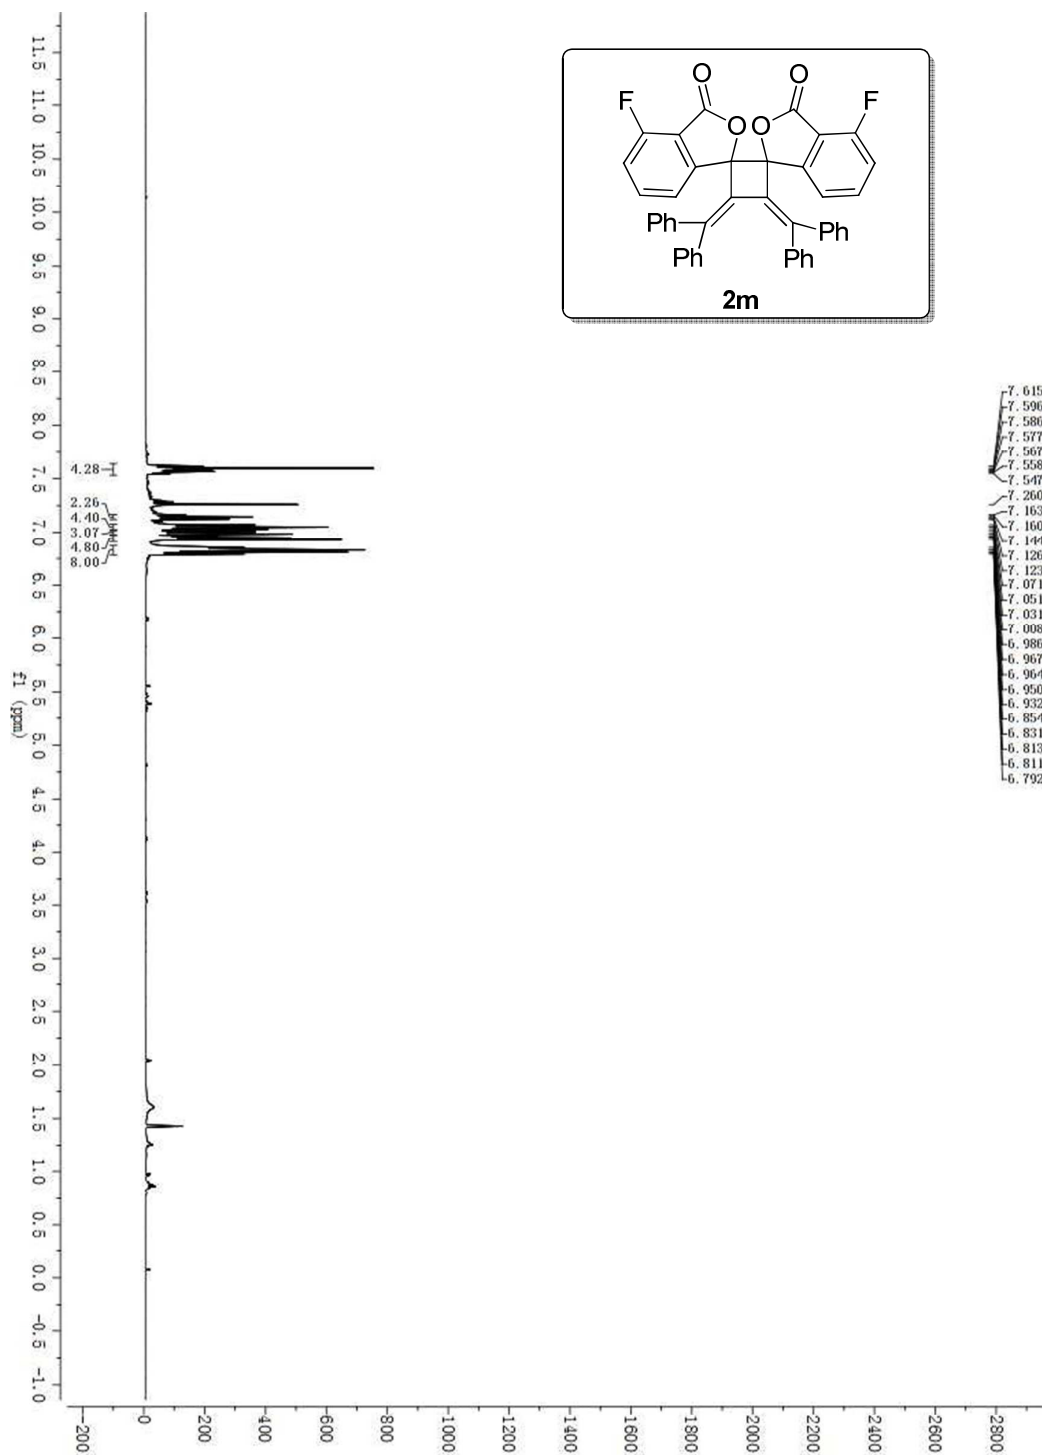

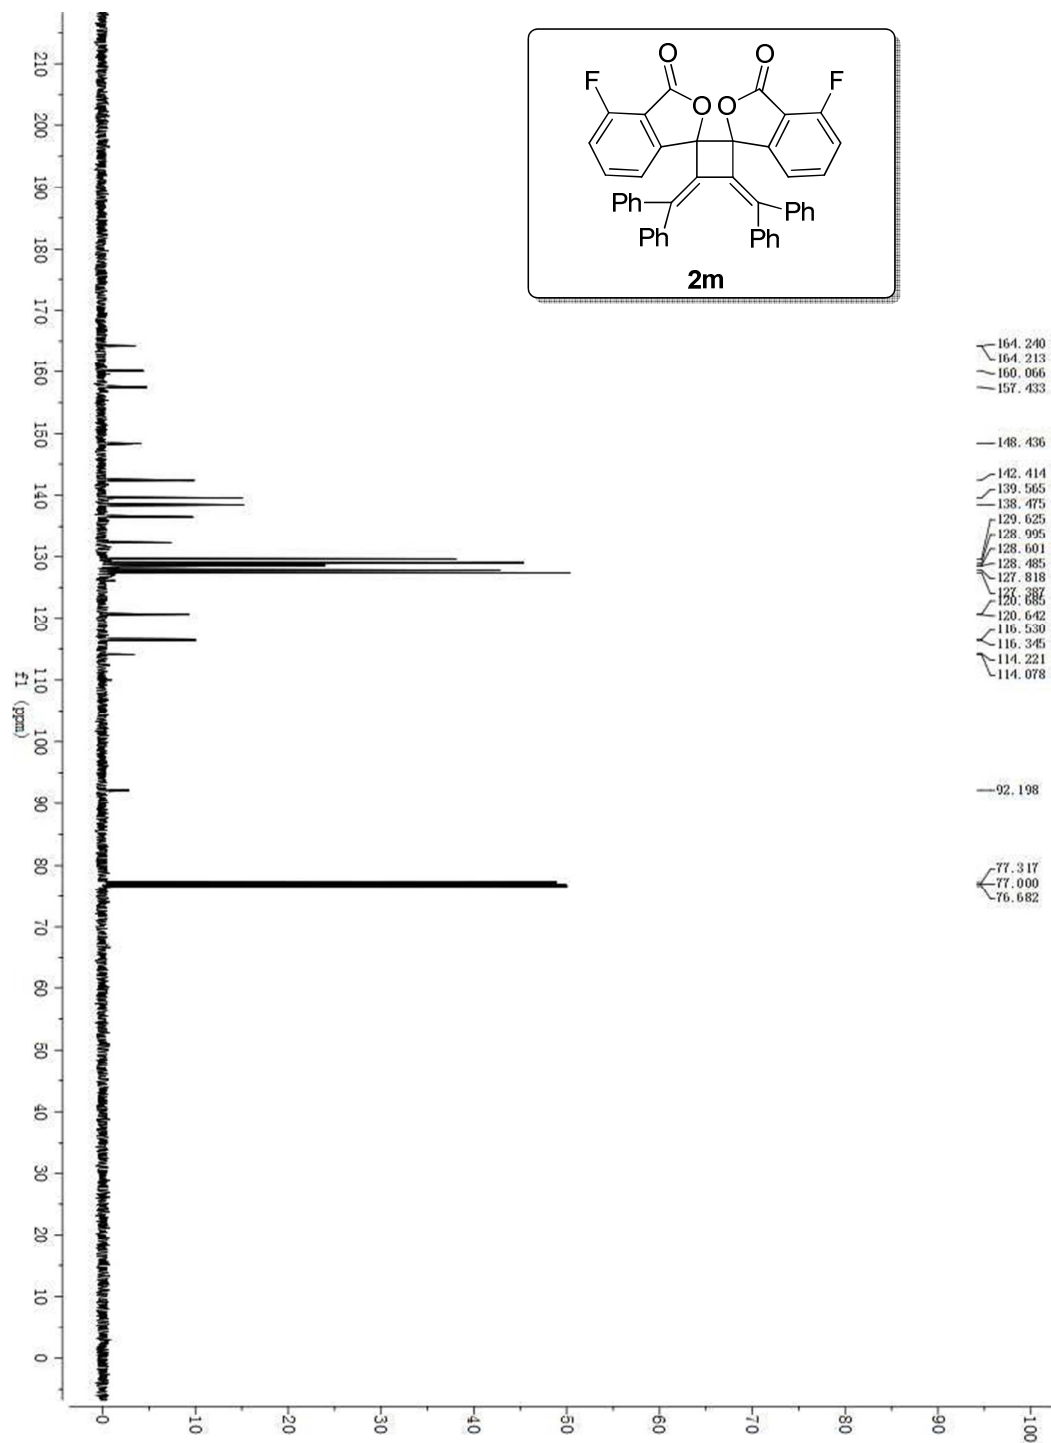

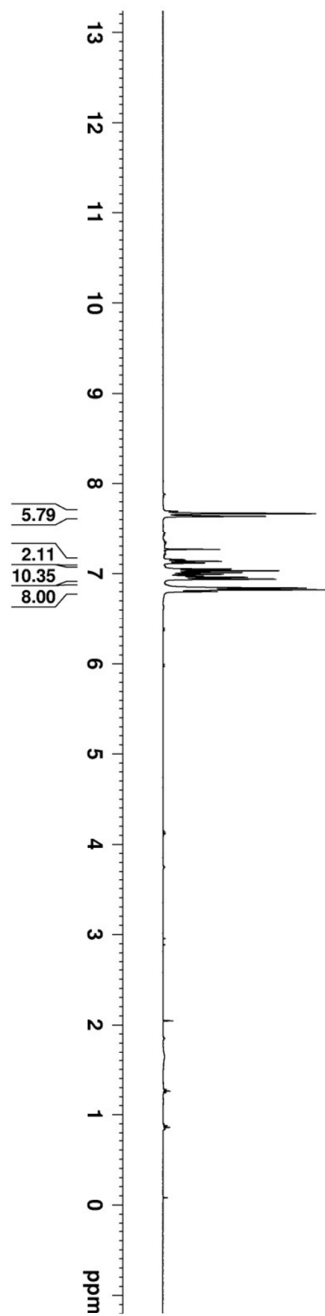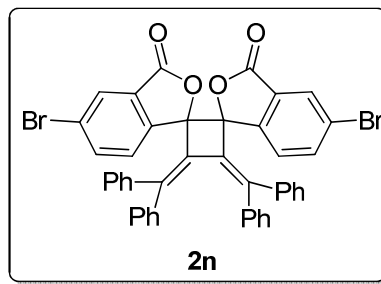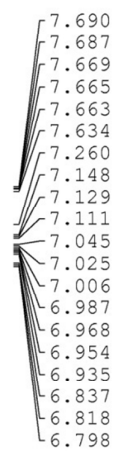



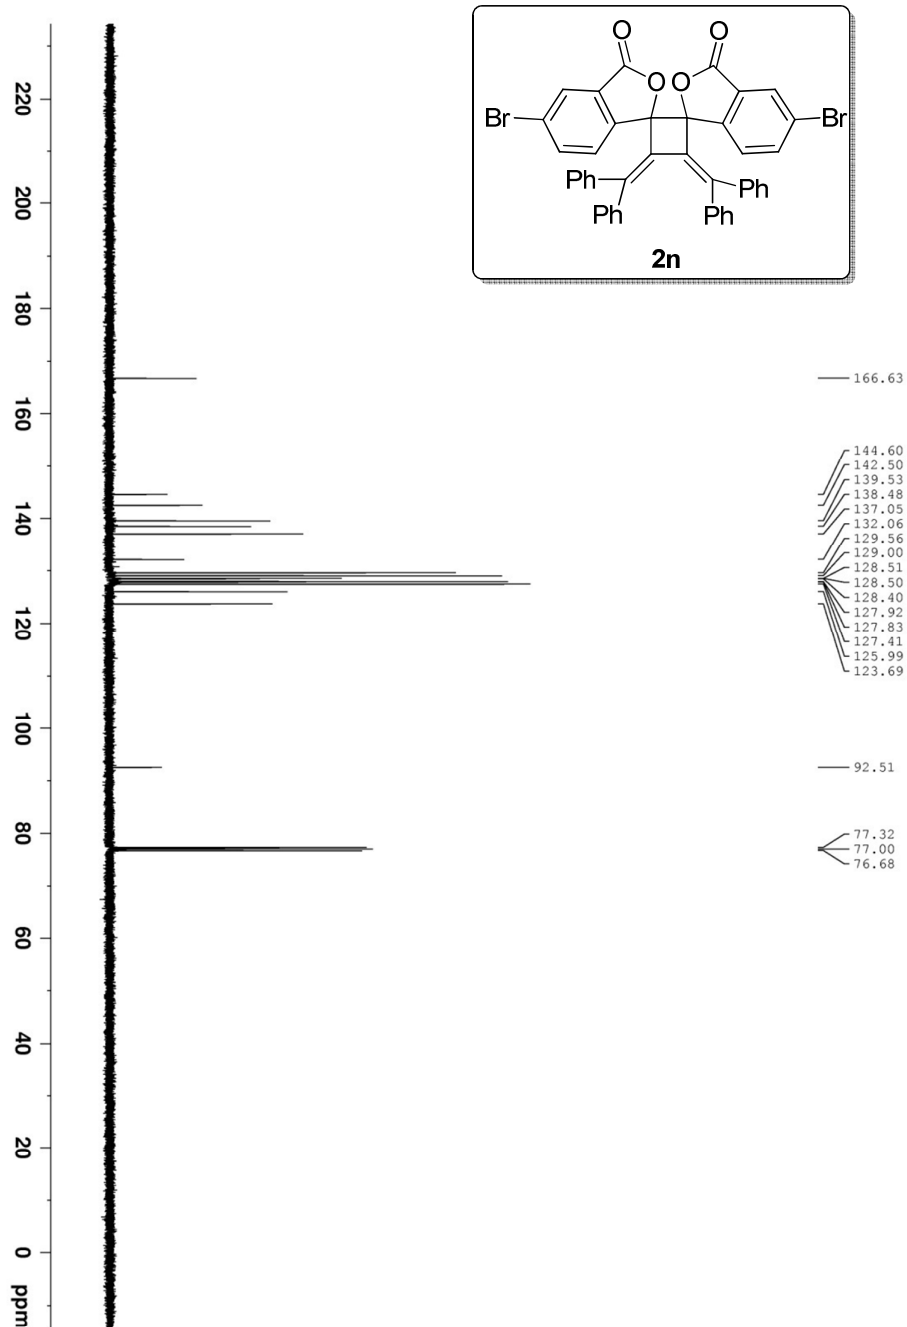

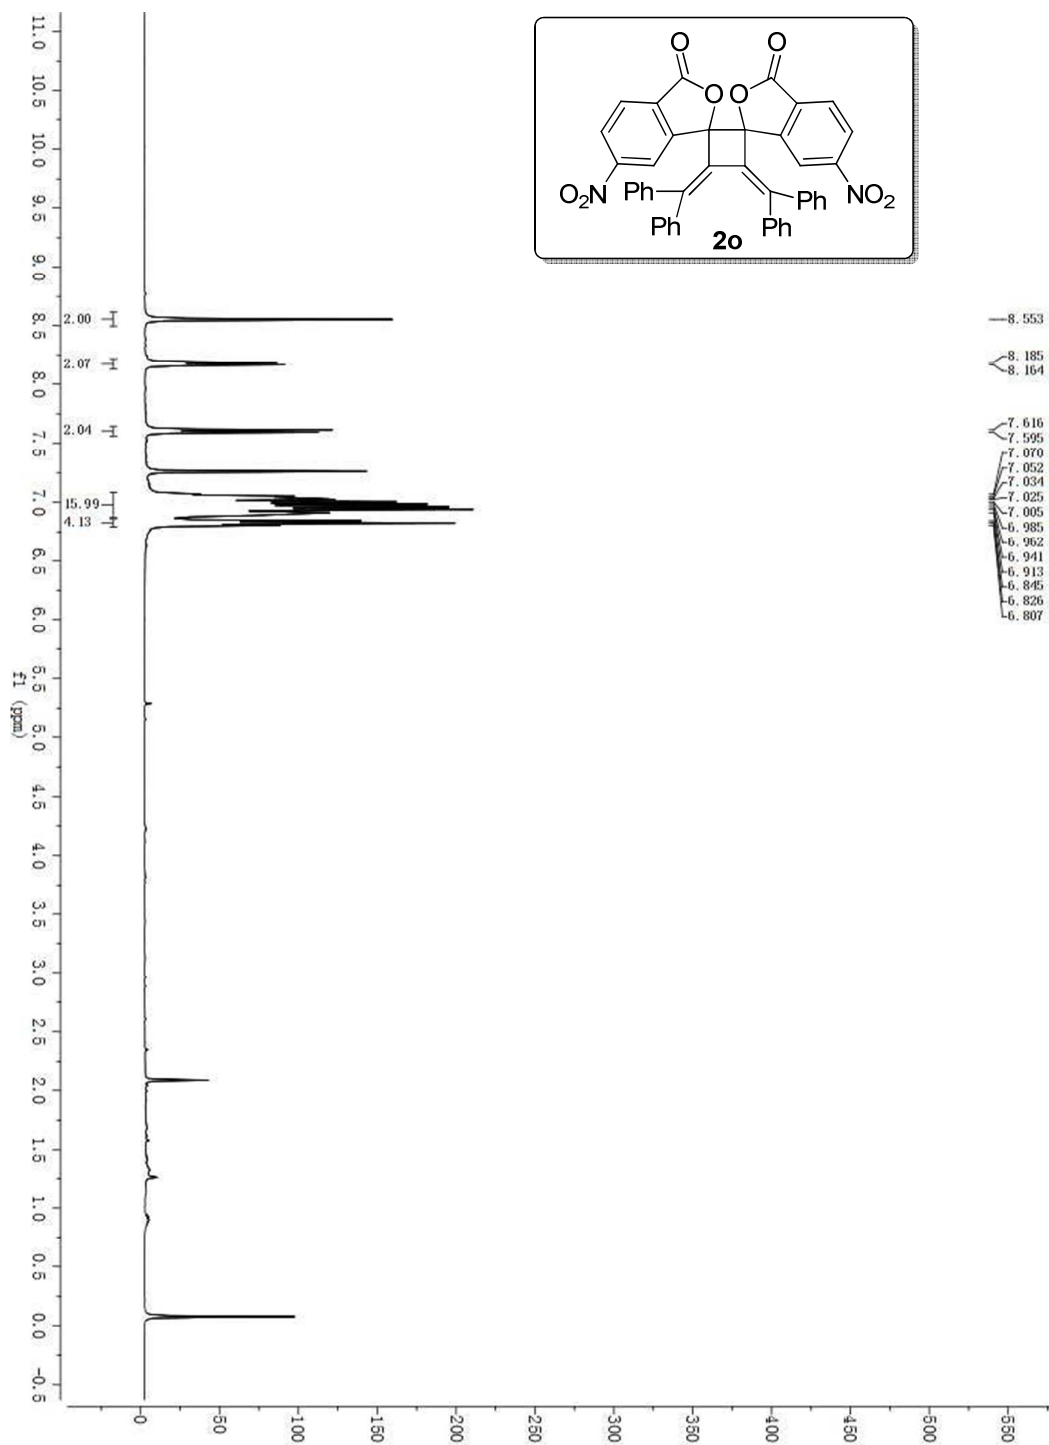

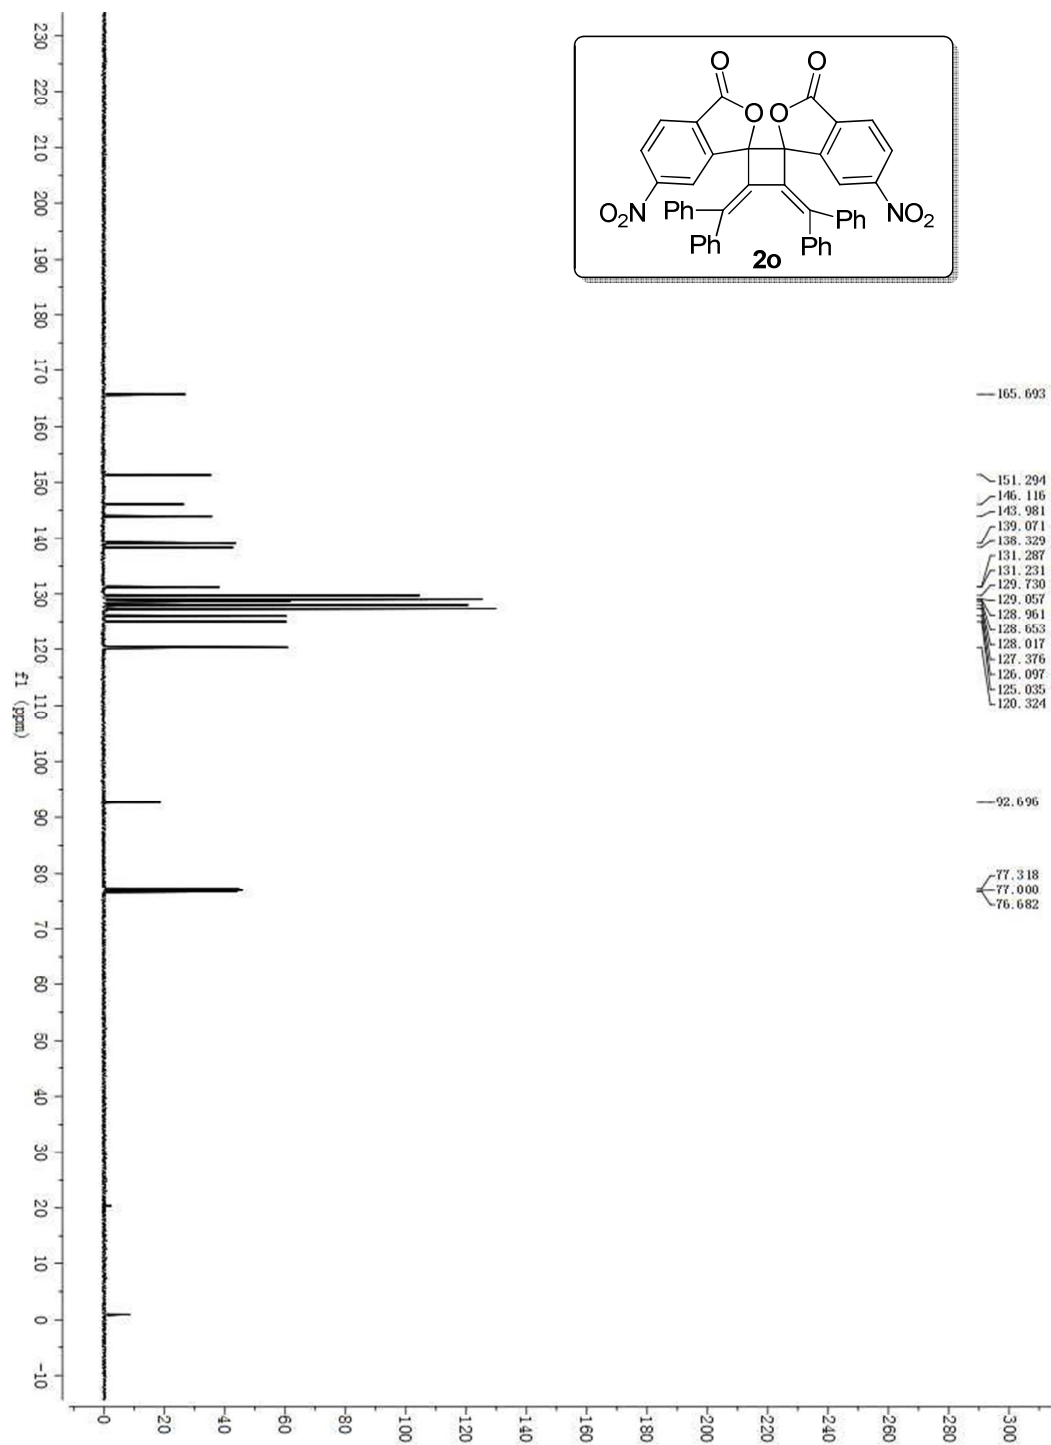

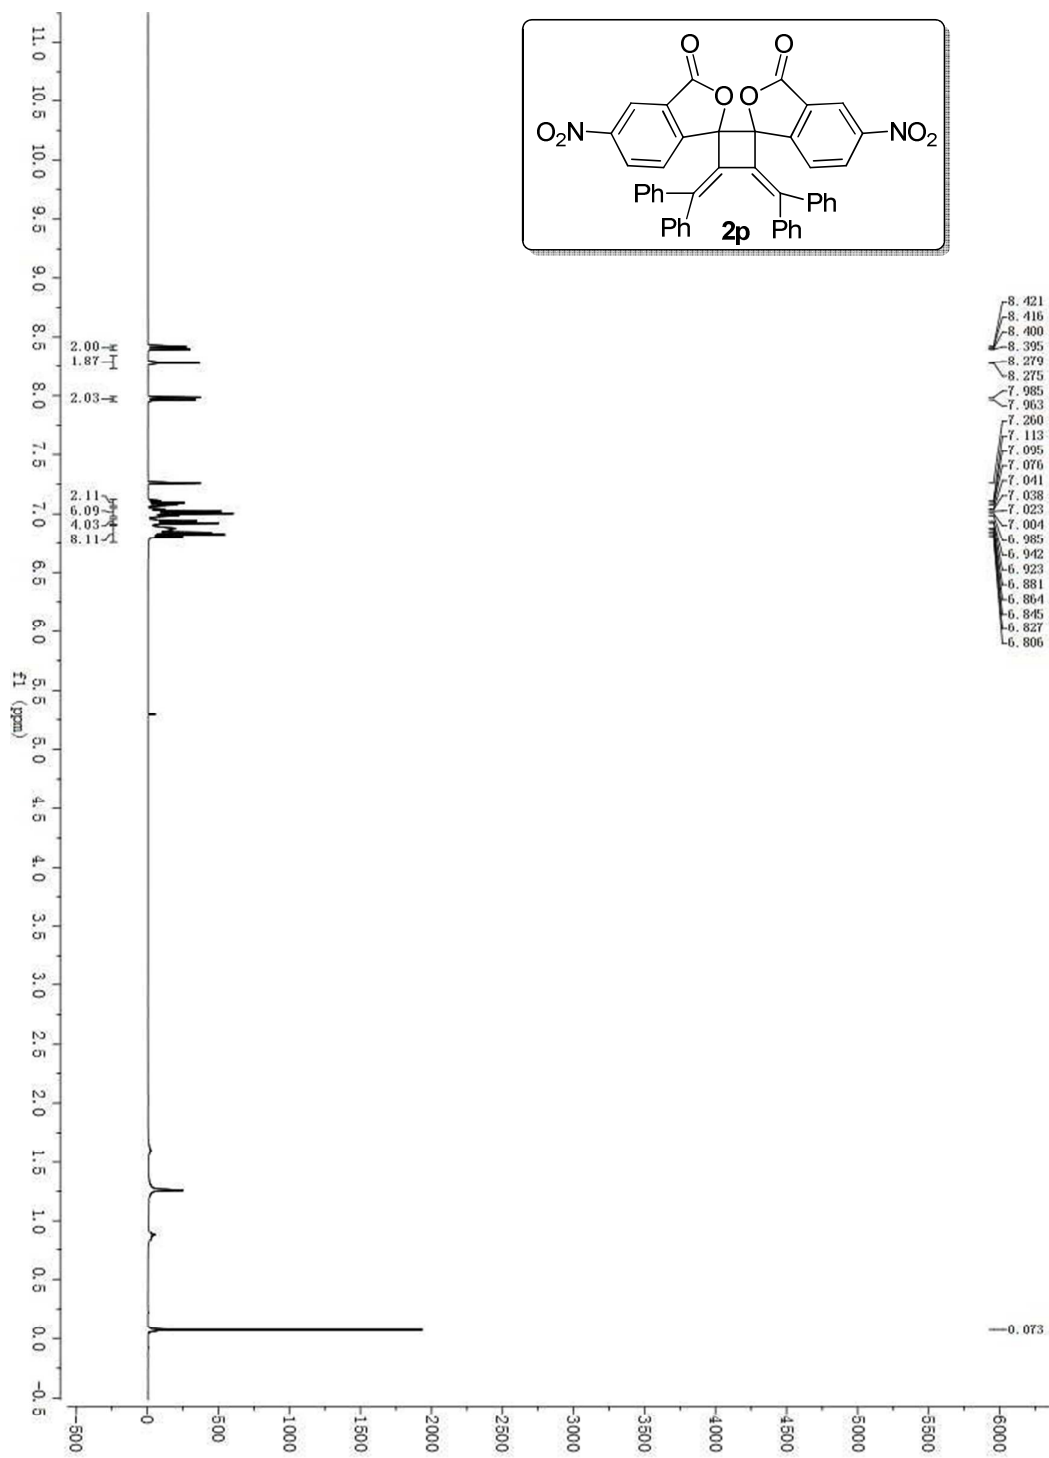

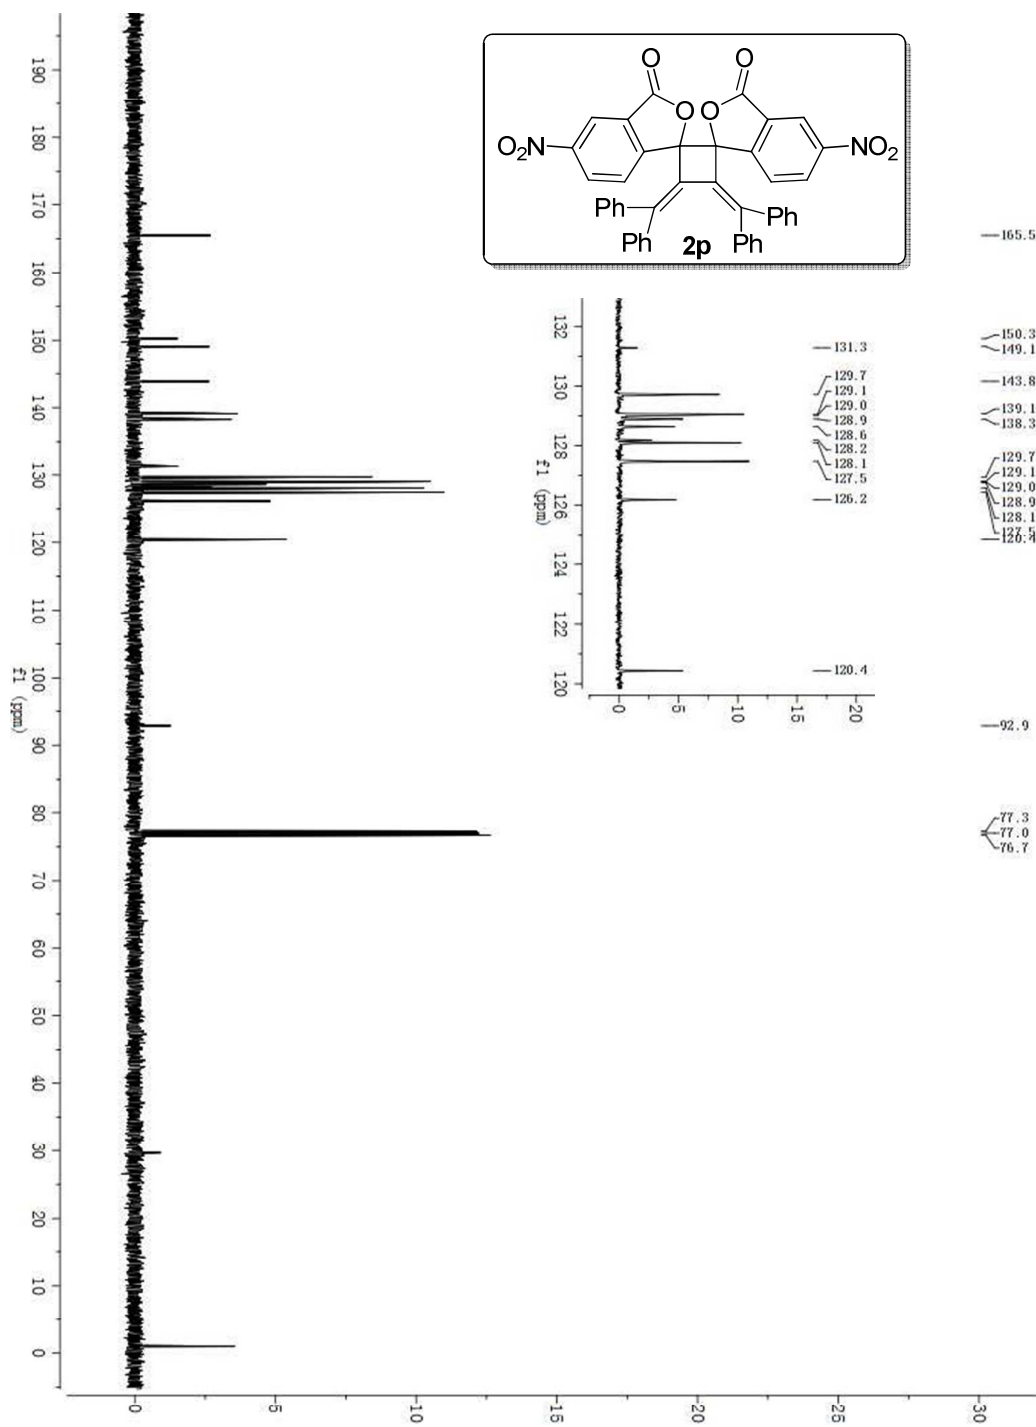



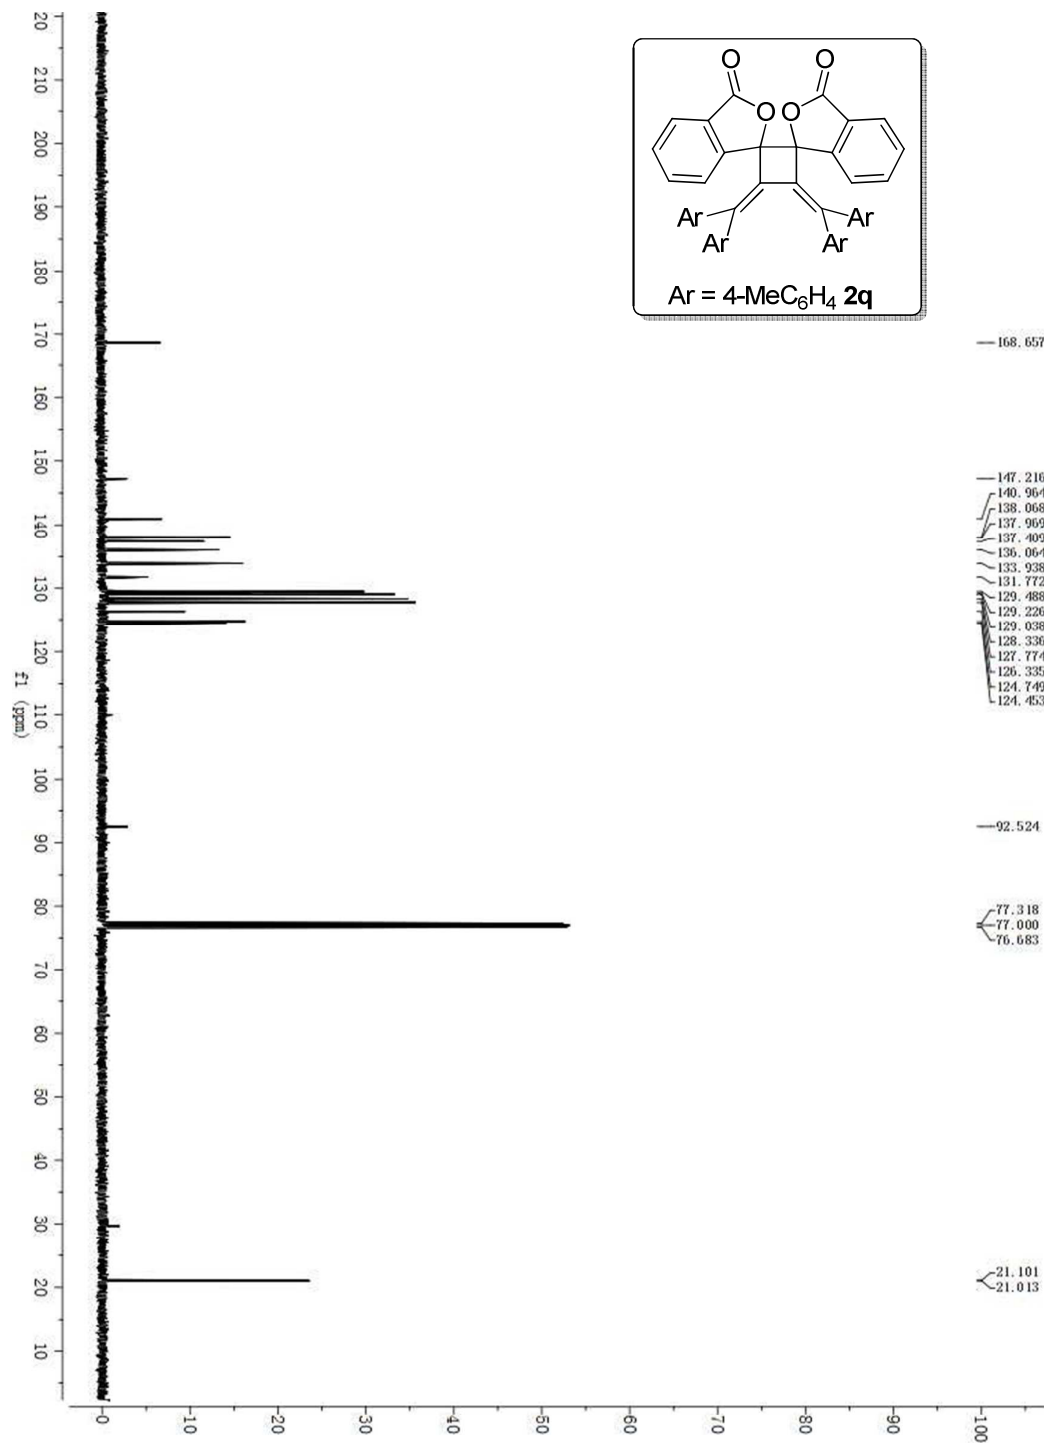

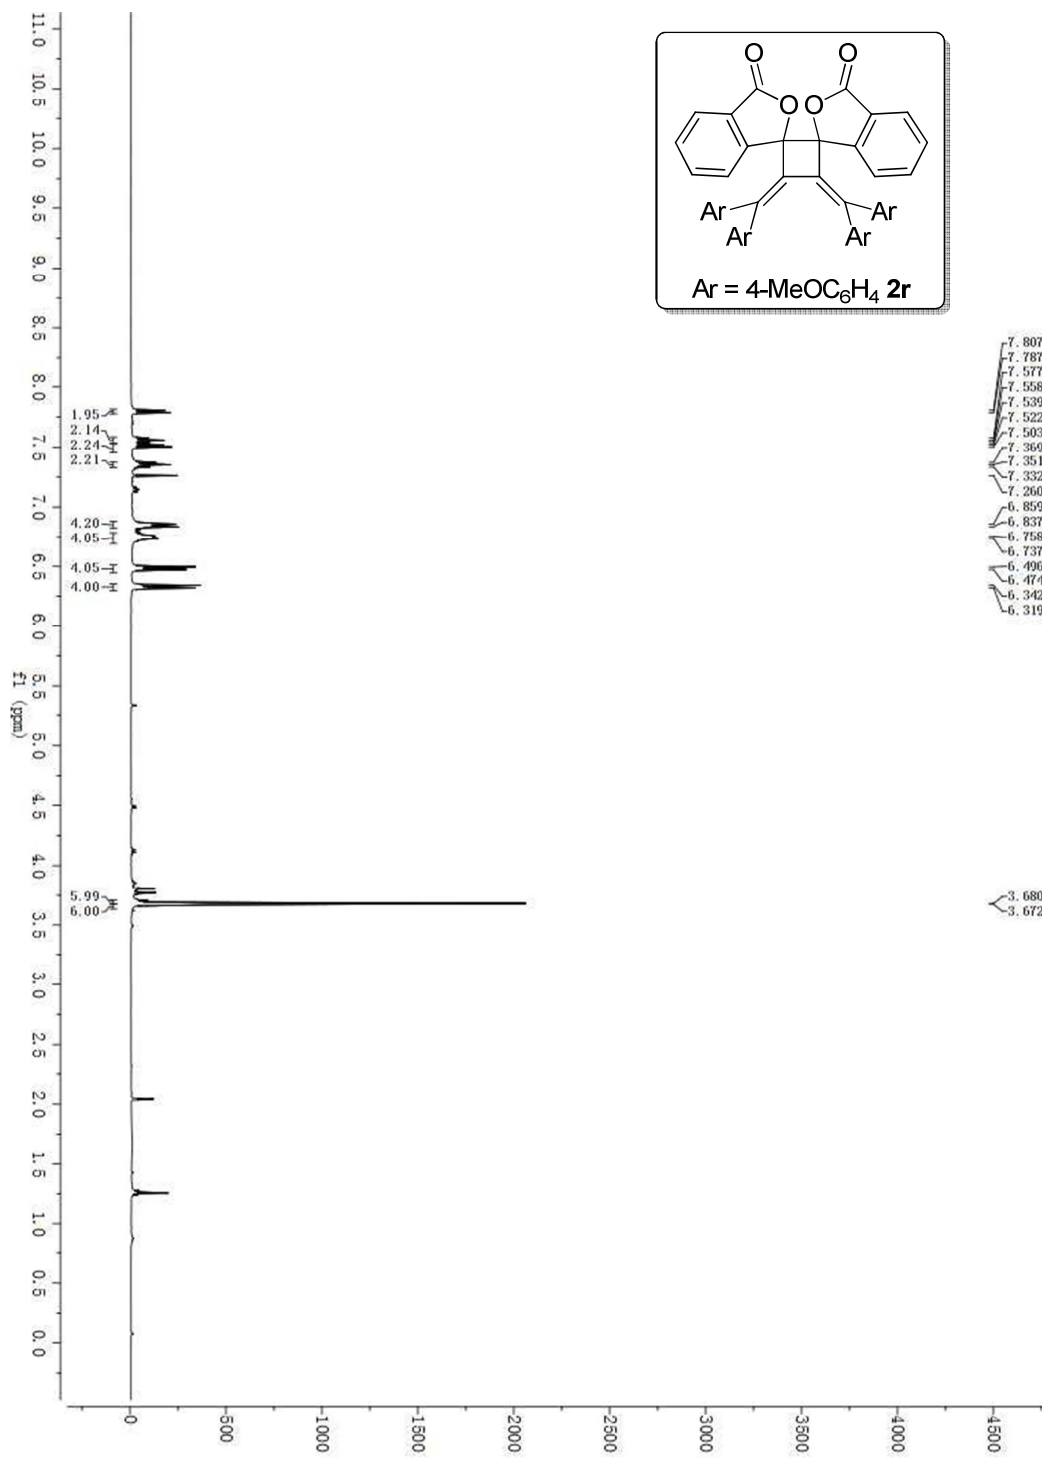



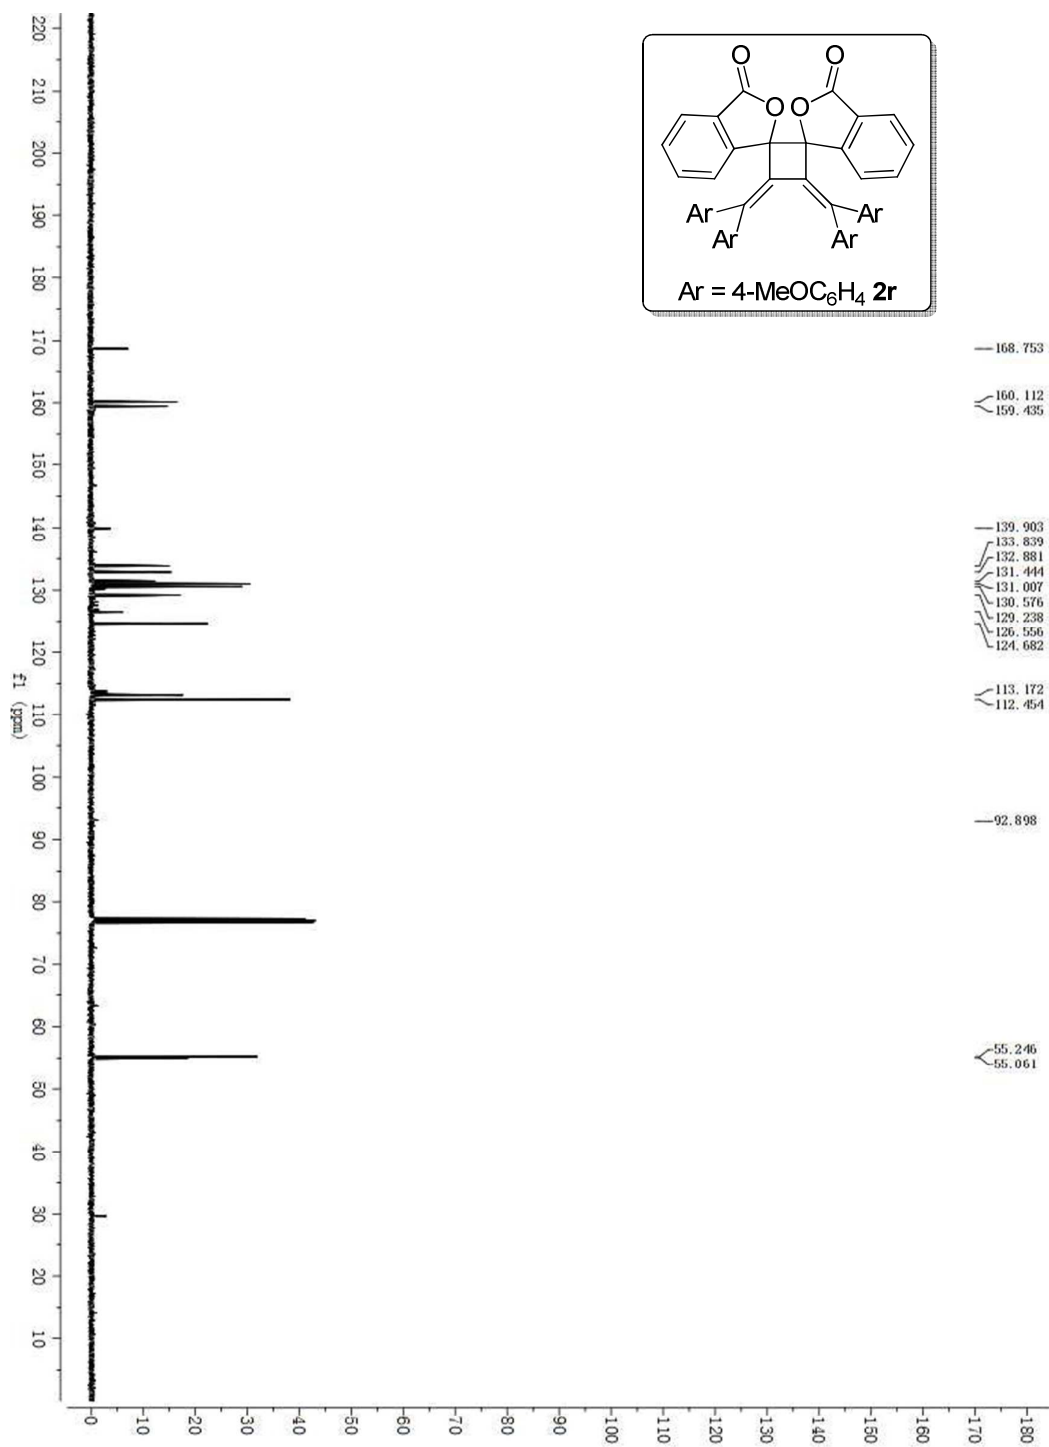

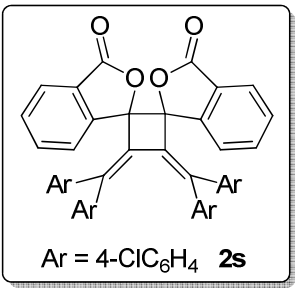

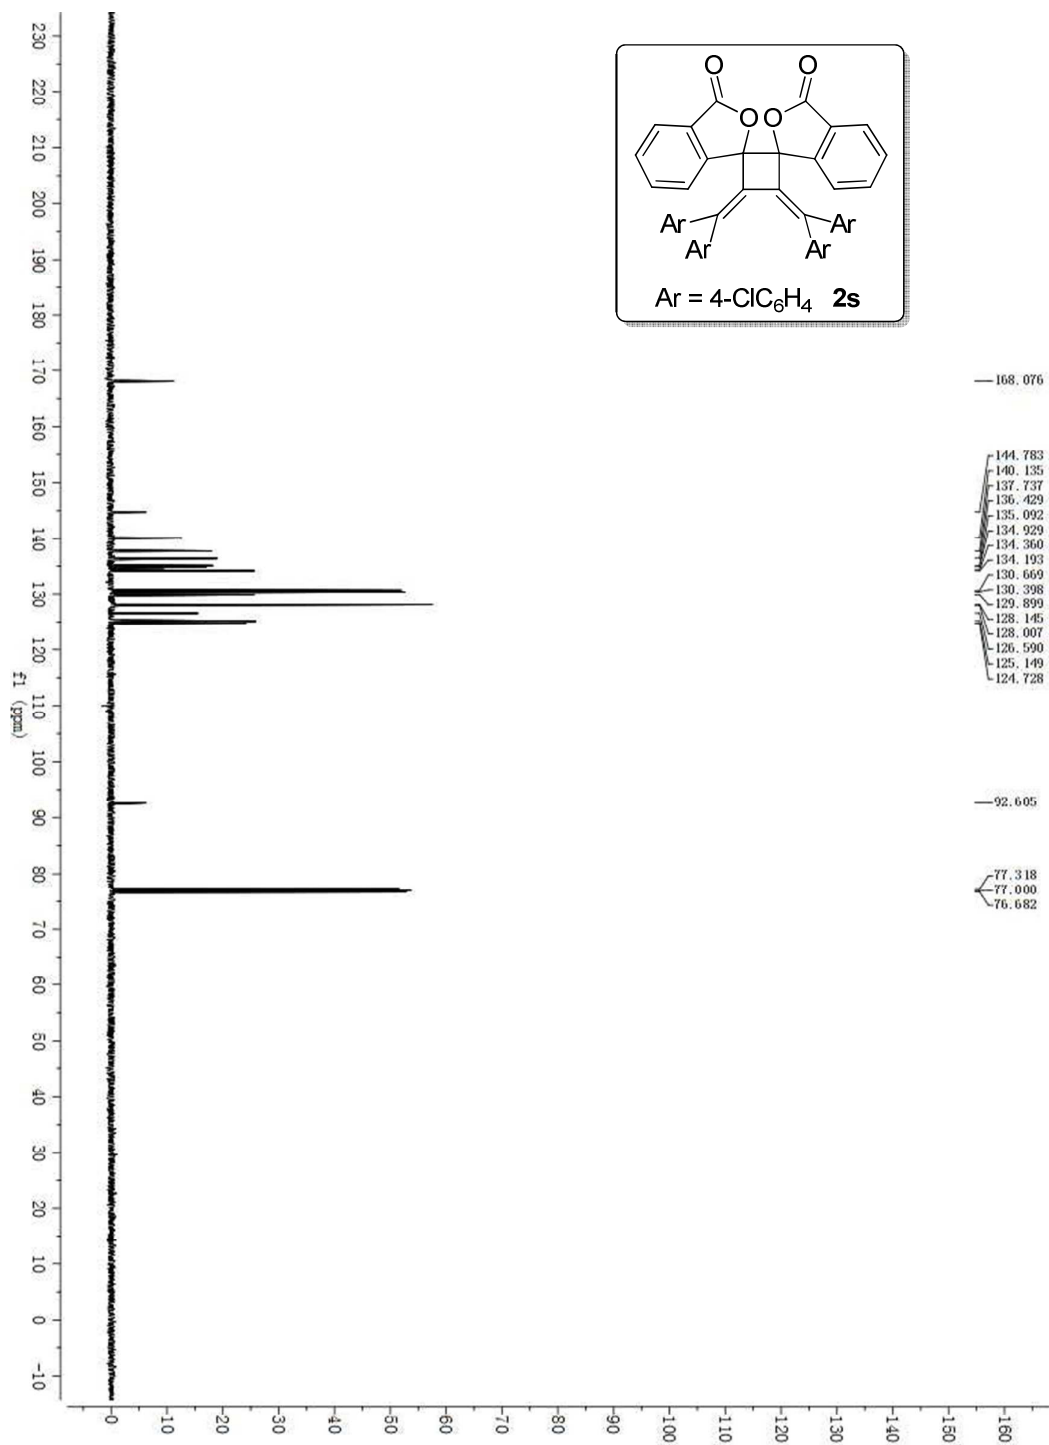

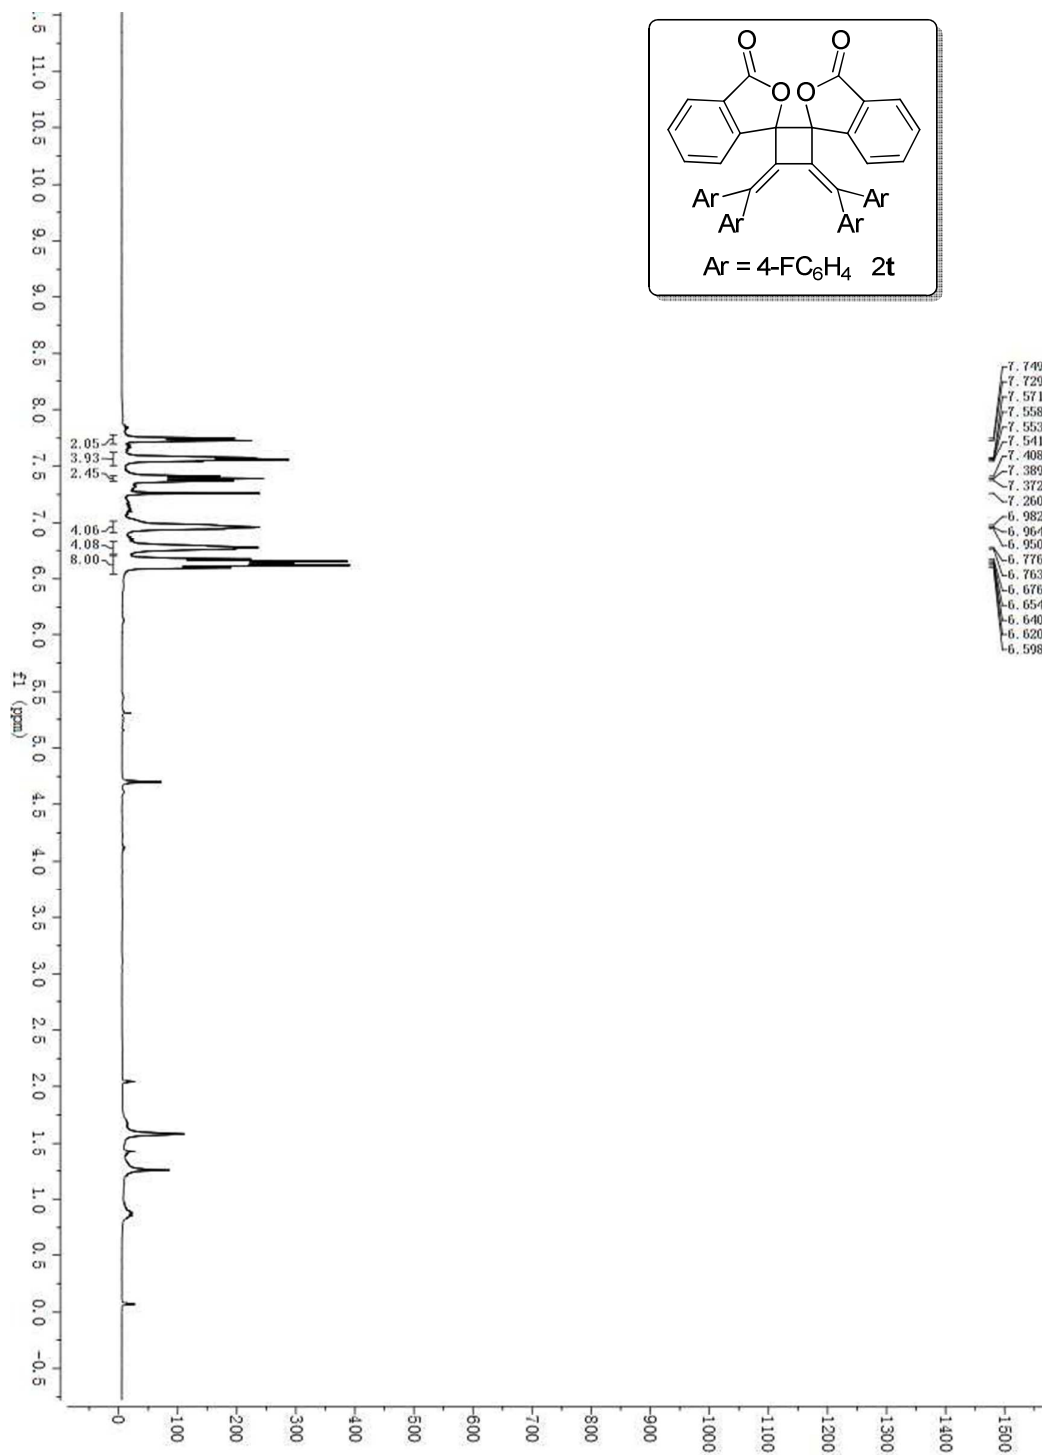

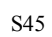

Supplement: Supplementary file 1 [file 5905401]
